# Supplementary material for: Comparison of DET, DGT and conventional porewater extractions for determining nutrient profiles and cycling in stream sediments
Source: Royal Society of Chemistry journal article supplement (doi:10.1039/c9em00312f), 2019-01-01
Supplement: c9em00312f1.pdf [file c9em00312f1.pdf]

## Supporting information

### **Comparison of DET, DGT and conventional porewater extractions for determining nutrient profiles and cycling in stream sediments**

*Jianyin Huang<sup>a,b</sup>, Hannah Franklin<sup>c</sup>, Peter R. Teasdale<sup>a,b,\*</sup>, Michele Burford<sup>c</sup>, Nadeeka Rathnayake Kankanamge<sup>d</sup>, William Bennett<sup>d</sup>, David Welsh<sup>d</sup>*

<sup>a</sup> Natural and Built Environments Research Centre, School of Natural and Built Environments, University of South Australia, SA 5095, Australia

<sup>b</sup> Future Industries Institute, University of South Australia, SA 5095, Australia

<sup>c</sup> Australian Rivers Institute, School of Environment, Griffith University, Nathan Campus, Griffith University, QLD 4111, Australia

<sup>d</sup> Environmental Futures Research Institute, School of Environment, Griffith University, Gold Coast campus, QLD 4215, Australia

\* Corresponding Author: peter.teasdale@unisa.edu.au. Tel: +61 (08) 830 25183

## Content

**Table S1.** Description, sediment characteristics, water quality measurements and water column dissolved nutrient concentrations at the two study sites.

**Table S2.** Average Fe (II) and PO<sub>4</sub>-P concentrations determined by colourimetric DET techniques.

**Table S3.** Ratio of C<sub>DGT</sub>/C<sub>PW</sub> and C<sub>DET</sub>/C<sub>PW</sub> for NH<sub>4</sub>-N at site 1.

**Table S4.** Ratio of C<sub>DGT</sub>/C<sub>PW</sub> and C<sub>DET</sub>/C<sub>PW</sub> for NH<sub>4</sub>-N at site 2.

**Table S5.** Ratio of C<sub>DGT</sub>/C<sub>PW</sub> and C<sub>DET</sub>/C<sub>PW</sub> for NO<sub>3</sub>-N at site 1 and 2.

**Figure S1.** Pore water Fe(II) depth profiles determined by colourimetric DET for each sediment core (1, 3, 4 and 5) at site 1 during light incubations.

**Figure S2.** Pore water PO<sub>4</sub>-P depth profiles determined by colourimetric DET for each sediment core (1, 2 and 5) at site 1 during light incubations.

**Figure S3.** Pore water Fe(II) depth profiles determined by colourimetric DET for each sediment core (1 - 5) at site 1 during dark incubations.

**Figure S4.** Pore water PO<sub>4</sub>-P depth profiles determined by colourimetric DET for each sediment core (1 - 5) at site 1 during dark incubations.

**Figure S5.** Pore water Fe(II) depth profiles determined by colourimetric DET for each sediment core (1 - 5) at site 2 during light incubations.

**Figure S6.** Pore water PO<sub>4</sub>-P depth profiles determined by colourimetric DET for each sediment core (1, 2, 3, and 4) at site 2 during light incubations.

**Figure S7.** Pore water Fe(II) depth profiles determined by colourimetric DET for each sediment core (1 - 5) at site 2 during dark incubations.

**Figure S8.** Pore water PO<sub>4</sub>-P depth profiles determined by colourimetric DET for each sediment core (1 - 5) at site 2 during light incubations.

**Figure S9.** Pore water NH<sub>4</sub>-N depth profiles determined by DGT, DET and conventional extraction for each sediment core (1 - 5) at site 1 during light incubations (1).

**Figure S10.** Pore water NH<sub>4</sub>-N depth profiles determined by DGT, DET and conventional extraction for each sediment core (1 - 5) at site 1 during light incubations (2).

**Figure S11.** Pore water  $\text{NH}_4\text{-N}$  depth profiles determined by DGT, DET and conventional extraction for each sediment core (1 - 5) at site 1 during dark incubations (1).

**Figure S12.** Pore water  $\text{NH}_4\text{-N}$  depth profiles determined by DGT, DET and conventional extraction for each sediment core (1 - 5) at site 1 during dark incubations (2).

**Figure S13.** Pore water  $\text{NH}_4\text{-N}$  depth profiles determined by DGT, DET and conventional extraction for each sediment core (1 - 5) at site 2 during light incubations (1).

**Figure S14.** Pore water  $\text{NH}_4\text{-N}$  depth profiles determined by DGT, DET and conventional extraction for each sediment core (1 - 5) at site 2 during light incubations (2).

**Figure S15.** Pore water  $\text{NH}_4\text{-N}$  depth profiles determined by DGT, DET and conventional extraction for each sediment core (1 - 5) at site 2 during dark incubations (1).

**Figure S16.** Pore water  $\text{NH}_4\text{-N}$  depth profiles determined by DGT, DET and conventional extraction for each sediment core (1 - 5) at site 2 during dark incubations (2).

**Figure S17.** Pore water  $\text{NH}_4\text{-N}$  and  $\text{NO}_3\text{-N}$  depth profiles determined by DGT for each sediment core (1 - 5) at site 1 during light incubations.

**Figure S18.** Pore water  $\text{NH}_4\text{-N}$  and  $\text{NO}_3\text{-N}$  depth profiles determined by DGT for each sediment core (1 - 5) at site 1 during dark incubations.

**Figure S19.** Pore water  $\text{NH}_4\text{-N}$  and  $\text{NO}_3\text{-N}$  depth profiles determined by DGT for each sediment core (1 - 5) at site 2 during light incubations.

**Figure S20.** Pore water  $\text{NH}_4\text{-N}$  and  $\text{NO}_3\text{-N}$  depth profiles determined by DGT for each sediment core (1 - 5) at site 2 during dark incubations.

**Figure S21.** Photos of (a) Site 1 and (b) Site 2 taken at the time of sampling. The area in which cores were collected is in the foreground of each photo.

### **Preparation of agarose diffusive gel**

Diffusive gels were prepared by dissolving 2.5% (w/v) ultrapure agarose (Life Technologies) in boiling water until completely dissolved. The solution was pipetted into molds, consisting of two acid washed glass plates clipped together and separated by a 0.125 cm thick spacer, respectively for different diffusive layer thicknesses, which were heated to 95°C to avoid premature setting of the gel. The gels were allowed to set for 45 minutes at room temperature and upon removal from the molds, washed 2-3 times in deionised water

### **Preparation of staining gel**

Gel stock solution consists of 40% Acrylamide/bisacrylamide solution, mixed in a 1:1.66 ratio with chilled deionised water. For every 10 mL of gel stock solution, 70 µL of 10% (m/v) potassium persulfate solution (AR grade, Sigma) and 20 µL of N, N, N, N-tetramethylethylenediamine (TEMED; Sigma) was added. The solution was pipetted into molds consisting of two acid washed glass plates separated by a 0.75 mm thick plastic spacer and allow to polymerise at room temperature in a fume hood. Polymerised gels were transferred into an acid-washed plastic container filled with deionised water and the water was changed 3-4 times, with a few hours between changes, to remove any unreacted reagents from the gels. Prepared gels were stored in deionised water at 4 °C.

## Nutrient concentrations determined by DGT and DET

The DGT-measured concentrations ( $C_{DGT}$ : ng mL<sup>-1</sup>, converted to µg L<sup>-1</sup>) of NH<sub>4</sub>-N and NO<sub>3</sub>-N in sediment pore waters were calculated from the accumulated analyte mass using the DGT equation (Eq 1) <sup>1</sup> :

$$C_{DGT} = M\Delta g/DAt \quad (1).$$

Where,  $M$  is the mass of analyte species bound to the binding phase (ng) determined by measuring the concentration of a known volume of the eluent or a dilution thereof, corrected using the elution factor <sup>2</sup>,  $\Delta g$  is the diffusive layer thickness (0.09 cm),  $D$  is the diffusion coefficient of the analyte species through the diffusive layer ( $1.42 \times 10^{-6}$  and  $1.07 \times 10^{-6}$  cm<sup>2</sup>s<sup>-1</sup> for NH<sub>4</sub>-N at site 1 and 2 respectively, and  $1.50 \times 10^{-6}$  cm<sup>2</sup>s<sup>-1</sup> for NO<sub>3</sub>-N) at experimental temperature (26°C),  $t$  is the deployment time (36000-43200 s, equal to 10-12 h) and  $A$  is the area of the probe exposed to the solution (1.8 cm<sup>2</sup>).

The concentration of nutrients from the DET deployments (µg L<sup>-1</sup>) were calculated from the dilution factor for the elution.

$$C_{DET} = Cs (V_e + V_g)/V_g \quad (2).$$

Where,  $C_s$  is the concentration of NH<sub>4</sub>-N/NO<sub>3</sub>-N measured in the eluent,  $V_e$  the eluent volume and  $V_g$  the gel volume (0.1125 mL).

**Table S1.** Description, sediment characteristics, water quality measurements and water column nutrient concentrations at the two study sites. Values are the mean  $\pm$  standard deviation (n = 3).

| Site                                                                     | Site 1            | Site 2            |
|--------------------------------------------------------------------------|-------------------|-------------------|
| <b>Site description</b>                                                  |                   |                   |
| Depth (m)                                                                | 0.67 $\pm$ 0.05   | 0.45 $\pm$ 0.06   |
| Field light intensity ( $\mu\text{mol m}^{-2} \text{s}^{-1}$ ), in air   | 2540              | 3040              |
| Field light intensity ( $\mu\text{mol m}^{-2} \text{s}^{-1}$ ), in water | 1680              | 900               |
| <b>Background water physicochemistry and nutrient concentrations</b>     |                   |                   |
| pH                                                                       | 8.0 $\pm$ 0.1     | 8.5 $\pm$ 0.2     |
| Temperature ( $^{\circ}\text{C}$ )                                       | 30.5 $\pm$ 0.1    | 31.4 $\pm$ 0.2    |
| DO saturation (%)                                                        | 81.6 $\pm$ 4.4    | 100.1 $\pm$ 7.3   |
| Conductivity ( $\mu\text{S cm}^{-1}$ )                                   | 1082.5 $\pm$ 14.8 | 495.5 $\pm$ 6.4   |
| Turbidity (NTU)                                                          | 2.1               | 17.5              |
| Chlorophyll a ( $\mu\text{g L}^{-1}$ )                                   | 0.33 $\pm$ 0.11   | 0.16 $\pm$ 0.05   |
| NH <sub>4</sub> -N ( $\mu\text{mol L}^{-1}$ )                            | 2.53 $\pm$ 0.24   | 1.56 $\pm$ 0.17   |
| NO <sub>3</sub> -N ( $\mu\text{mol L}^{-1}$ )                            | 0.43 $\pm$ 0.22   | 0.16 $\pm$ 0.22   |
| PO <sub>4</sub> -P ( $\mu\text{mol L}^{-1}$ )                            | 0.51 $\pm$ 0.02   | 0.42 $\pm$ 0.03   |
| TDN ( $\mu\text{mol L}^{-1}$ )                                           | 20.09 $\pm$ 1.61  | 33.27 $\pm$ 10.29 |
| TDP ( $\mu\text{mol L}^{-1}$ )                                           | 0.71 $\pm$ 0.02   | 0.65 $\pm$ 0.09   |
| TN ( $\mu\text{mol L}^{-1}$ )                                            | 23.81 $\pm$ 3.60  | 29.29 $\pm$ 4.46  |
| TP ( $\mu\text{mol L}^{-1}$ )                                            | 0.65 $\pm$ <0.01  | 0.86 $\pm$ 0.19   |
| TC ( $\text{mmol L}^{-1}$ )                                              | 1.48 $\pm$ 0.16   | 1.70 $\pm$ 0.17   |
| TOC ( $\text{mmol L}^{-1}$ )                                             | 0.34 $\pm$ 0.14   | 0.49 $\pm$ 0.15   |
| <b>Sediment characteristics</b>                                          |                   |                   |
| Clay (0–2 $\mu\text{m}$ ) (%)                                            | 1.0 $\pm$ 0.18    | 1.5 $\pm$ 0.28    |
| Silt (2–20 $\mu\text{m}$ ) (%)                                           | 11.3 $\pm$ 2.3    | 18.8 $\pm$ 2.5    |
| Fine sand (20–200 $\mu\text{m}$ ) (%)                                    | 31.6 $\pm$ 1.6    | 27.75 $\pm$ 2.8   |
| Coarse sand (200–2000 $\mu\text{m}$ ) (%)                                | 52.8 $\pm$ 3.6    | 13.4 $\pm$ 3.6    |
| Gravel (>2000 $\mu\text{m}$ ) (%)                                        | 3.3 $\pm$ 2.1     | 38.3 $\pm$ 6.11   |
| Sediment surface chlorophyll <i>a</i> ( $\text{mg m}^{-2}$ )             | 255.6 $\pm$ 145.8 | 80.0 $\pm$ 66.73  |
| Total nitrogen (%)                                                       | 0.03 $\pm$ 0.01   | 0.05 $\pm$ 0.02   |
| Total phosphorus (%)                                                     | 0.02 $\pm$ <0.01  | 0.03 $\pm$ 0.01   |
| Total organic carbon (%)                                                 | 0.29 $\pm$ 0.11   | 0.62 $\pm$ 0.27   |
| Gravimetric moisture content (%)                                         | 65.2 $\pm$ 34.6   | 47.3 $\pm$ 27.7   |
| Bulk density ( $\text{g cm}^{-3}$ )                                      | 1.10 $\pm$ 0.23   | 1.34 $\pm$ 0.32   |
| Porosity (%)                                                             | 58.5 $\pm$ 8.81   | 49.5 $\pm$ 12.3   |

**Table S2.** The average Fe (II) and PO<sub>4</sub>-P concentrations determined by colourimetric DET techniques.

|        |       | Fe (II) ( $\mu\text{mol L}^{-1}$ ) | PO <sub>4</sub> -P ( $\mu\text{mol L}^{-1}$ ) |
|--------|-------|------------------------------------|-----------------------------------------------|
| Site 1 | Light | 29.5 $\pm$ 21.7                    | 3.8 $\pm$ 2.7                                 |
|        | Dark  | 37.6 $\pm$ 26.1                    | 5.3 $\pm$ 4.1                                 |
| Site 2 | Light | 80.6 $\pm$ 78.7                    | 16.5 $\pm$ 14.4                               |
|        | Dark  | 127.2 $\pm$ 99.8                   | 22.9 $\pm$ 18.6                               |

**Table S3.** Ratio of C<sub>DGT</sub>/C<sub>CPW</sub> and C<sub>DET</sub>/C<sub>CPW</sub> for NH<sub>4</sub>-N at site 1.

| Site 1<br>Depth | Light                              |                                    | Dark                               |                                    |
|-----------------|------------------------------------|------------------------------------|------------------------------------|------------------------------------|
|                 | C <sub>DGT</sub> /C <sub>CPW</sub> | C <sub>DET</sub> /C <sub>CPW</sub> | C <sub>DGT</sub> /C <sub>CPW</sub> | C <sub>DET</sub> /C <sub>CPW</sub> |
| -0.5            | 0.13                               | 0.17                               | 0.12                               | 0.16                               |
| 0.5             | 0.18                               | 0.27                               | 0.19                               | 0.30                               |
| 1.5             | 0.27                               | 0.44                               | 0.18                               | 0.44                               |
| 2.5             | 0.27                               | 0.47                               | 0.18                               | 0.58                               |
| 3.5             | 0.47                               | 0.83                               | 0.17                               | 0.30                               |
| 4.5             | 0.32                               | 0.61                               | 0.18                               | 0.26                               |
| 5.5             | 0.28                               | 0.57                               | 0.16                               | 0.30                               |
| 6.5             | 0.28                               | 0.71                               | 0.17                               | 0.43                               |
| 7.5             | 0.21                               | 0.51                               | 0.16                               | 0.39                               |
| 8.5             | 0.18                               | 0.43                               | 0.19                               | 0.36                               |

**Table S4.** Ratio of  $C_{DGT}/C_{PW}$  and  $C_{DET}/C_{PW}$  for  $NH_4-N$  at site 2.

| Site 2<br>Depth | Light            |                  | Dark             |                  |
|-----------------|------------------|------------------|------------------|------------------|
|                 | $C_{DGT}/C_{PW}$ | $C_{DET}/C_{PW}$ | $C_{DGT}/C_{PW}$ | $C_{DET}/C_{PW}$ |
| -0.5            | 0.53             | 2.03             | 0.10             | 0.14             |
| 0.5             | 0.19             | 0.50             | 0.16             | 0.37             |
| 1.5             | 0.20             | 0.57             | 0.20             | 0.59             |
| 2.5             | 0.23             | 0.67             | 0.15             | 0.52             |
| 3.5             | 0.29             | 0.55             | 0.39             | 0.79             |
| 4.5             | 0.27             | 0.46             | 0.19             | 0.76             |
| 5.5             | 0.25             | 0.52             | 0.22             | 0.69             |
| 6.5             | 0.22             | 0.71             | 0.17             | 0.84             |
| 7.5             | 0.27             | 1.01             | 0.20             | 0.88             |
| 8.5             | 0.25             | 0.85             | 0.21             | 0.95             |

**Table S5.** Ratio of  $C_{DGT}/C_{PW}$  and  $C_{DET}/C_{PW}$  for  $NO_3-N$  at site 1 and 2.

|               | Light            |                  | Dark             |                  |
|---------------|------------------|------------------|------------------|------------------|
|               | $C_{DGT}/C_{PW}$ | $C_{DET}/C_{PW}$ | $C_{DGT}/C_{PW}$ | $C_{DET}/C_{PW}$ |
| <b>Site 1</b> |                  |                  |                  |                  |
| Core 1        | -                | -                | 0.81             | -                |
| Core 2        | -                | -                | 0.61             | -                |
| Core 3        | -                | -                | 0.60             | -                |
| Core 4        | 0.10             | -                | 0.34             | -                |
| Core 5        | -                | -                | -                | -                |
| <b>Site 2</b> |                  |                  |                  |                  |
| Core 1        | -                | -                | 0.11             | -                |
| Core 2        | -                | -                | 0.37             | -                |
| Core 3        | 0.17             | -                | 0.52             | -                |
| Core 4        | -                | -                | 0.54             | -                |
| Core 5        | 0.17             | -                | 0.08             | -                |



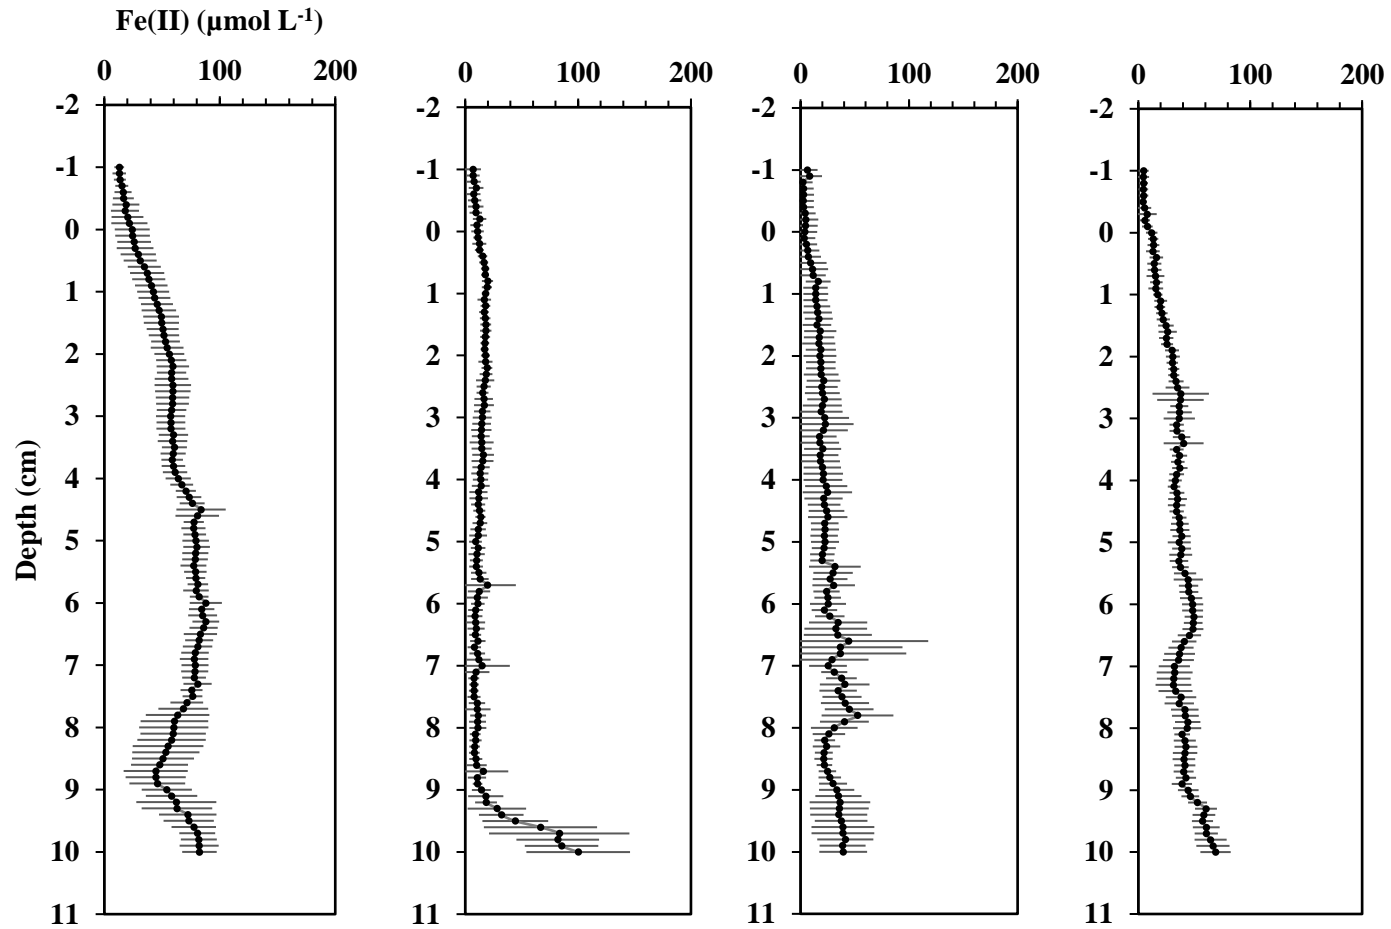

1

2 **Figure S1.** Pore water Fe (II) depth profiles determined by colourimetric DET for each sediment core (1, 3, 4 and 5) at site 1 during  
 3 light incubations.

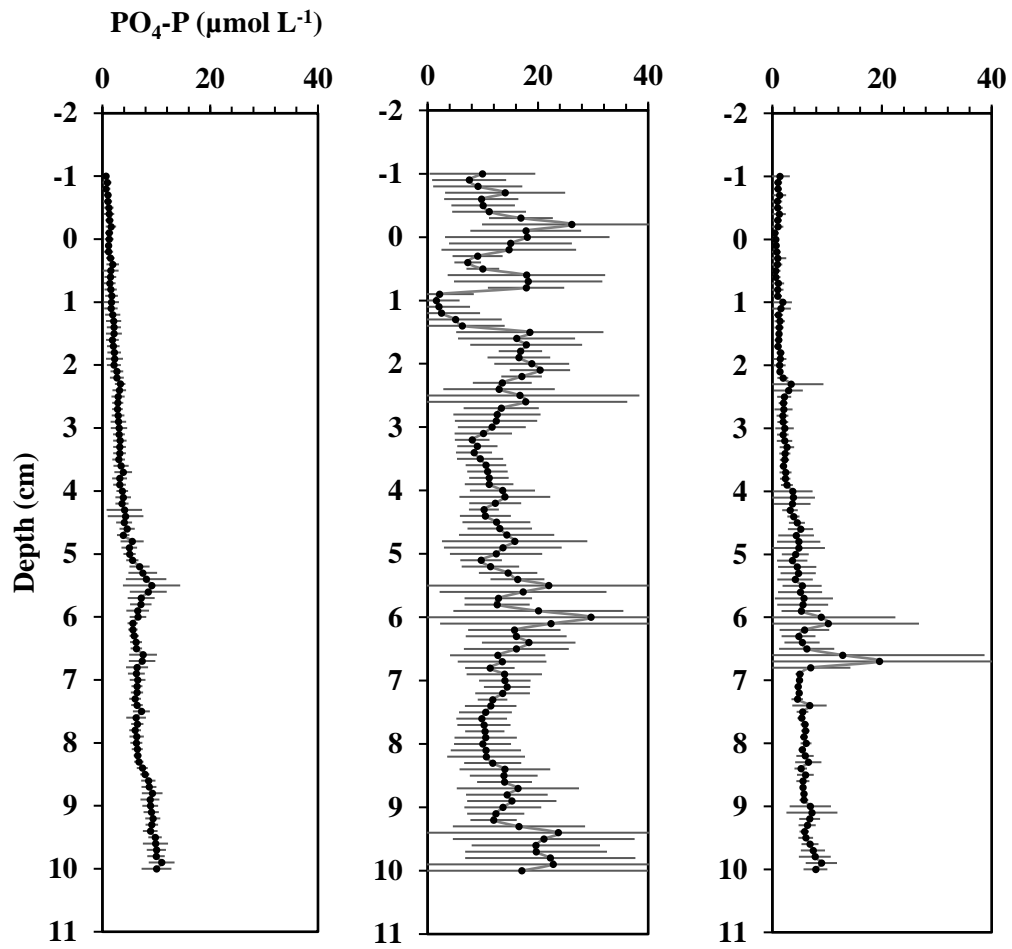

**Figure S2.** Pore water PO<sub>4</sub>-P depth profiles determined by colourimetric DET for each sediment core (1, 2 and 5) at site 1 during light incubations.

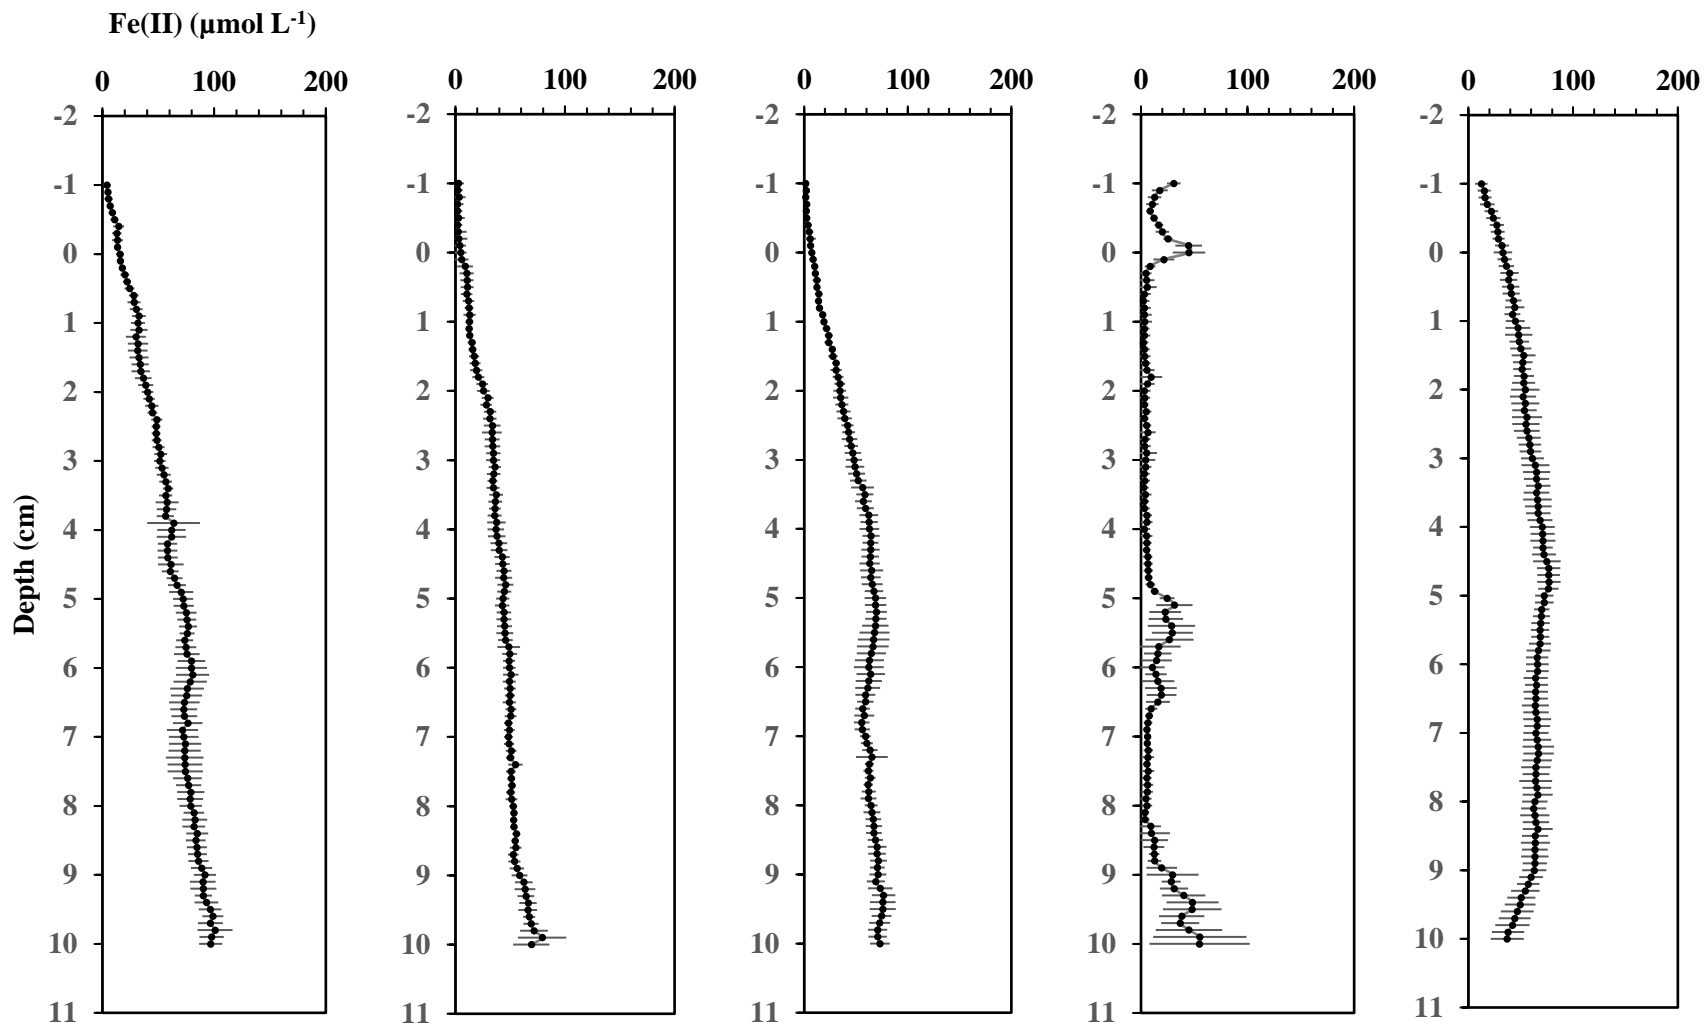

**Figure S3.** Pore water Fe (II) depth profiles determined by colourimetric DET for each sediment core (1 - 5) at site 1 during dark incubations.

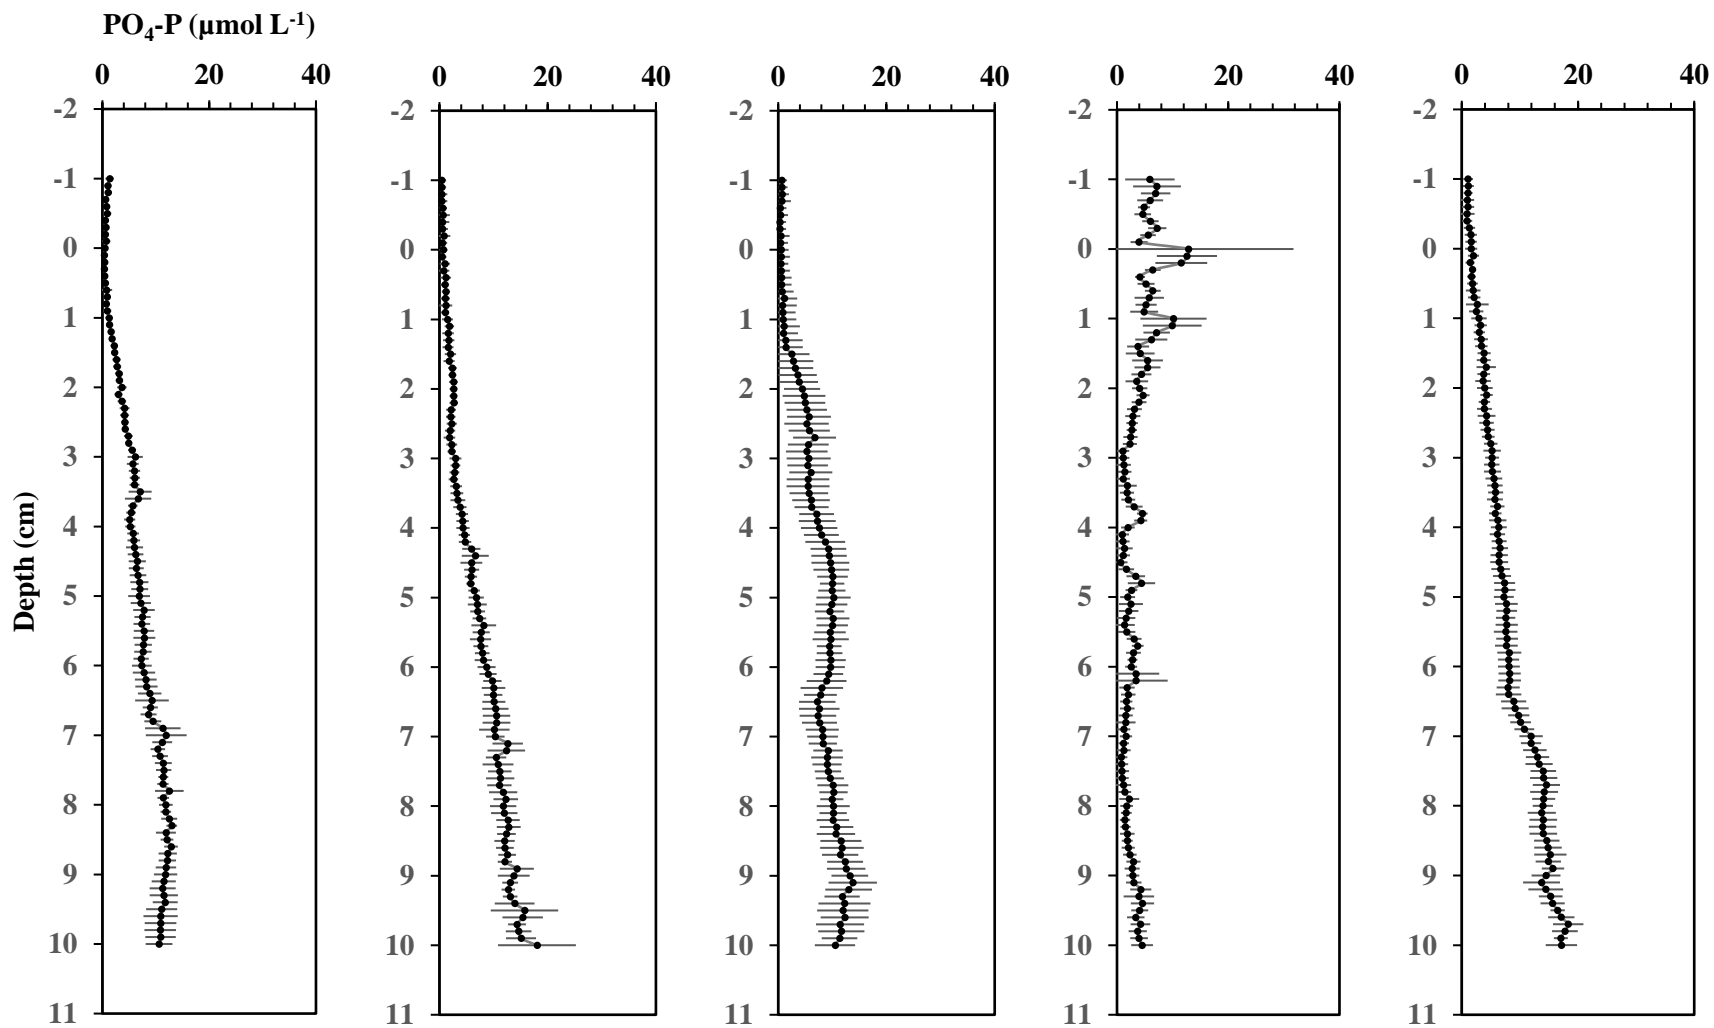

**Figure S4.** Pore water  $\text{PO}_4\text{-P}$  depth profiles determined by colourimetric DET for each sediment core (1 - 5) at site 1 during dark incubations.

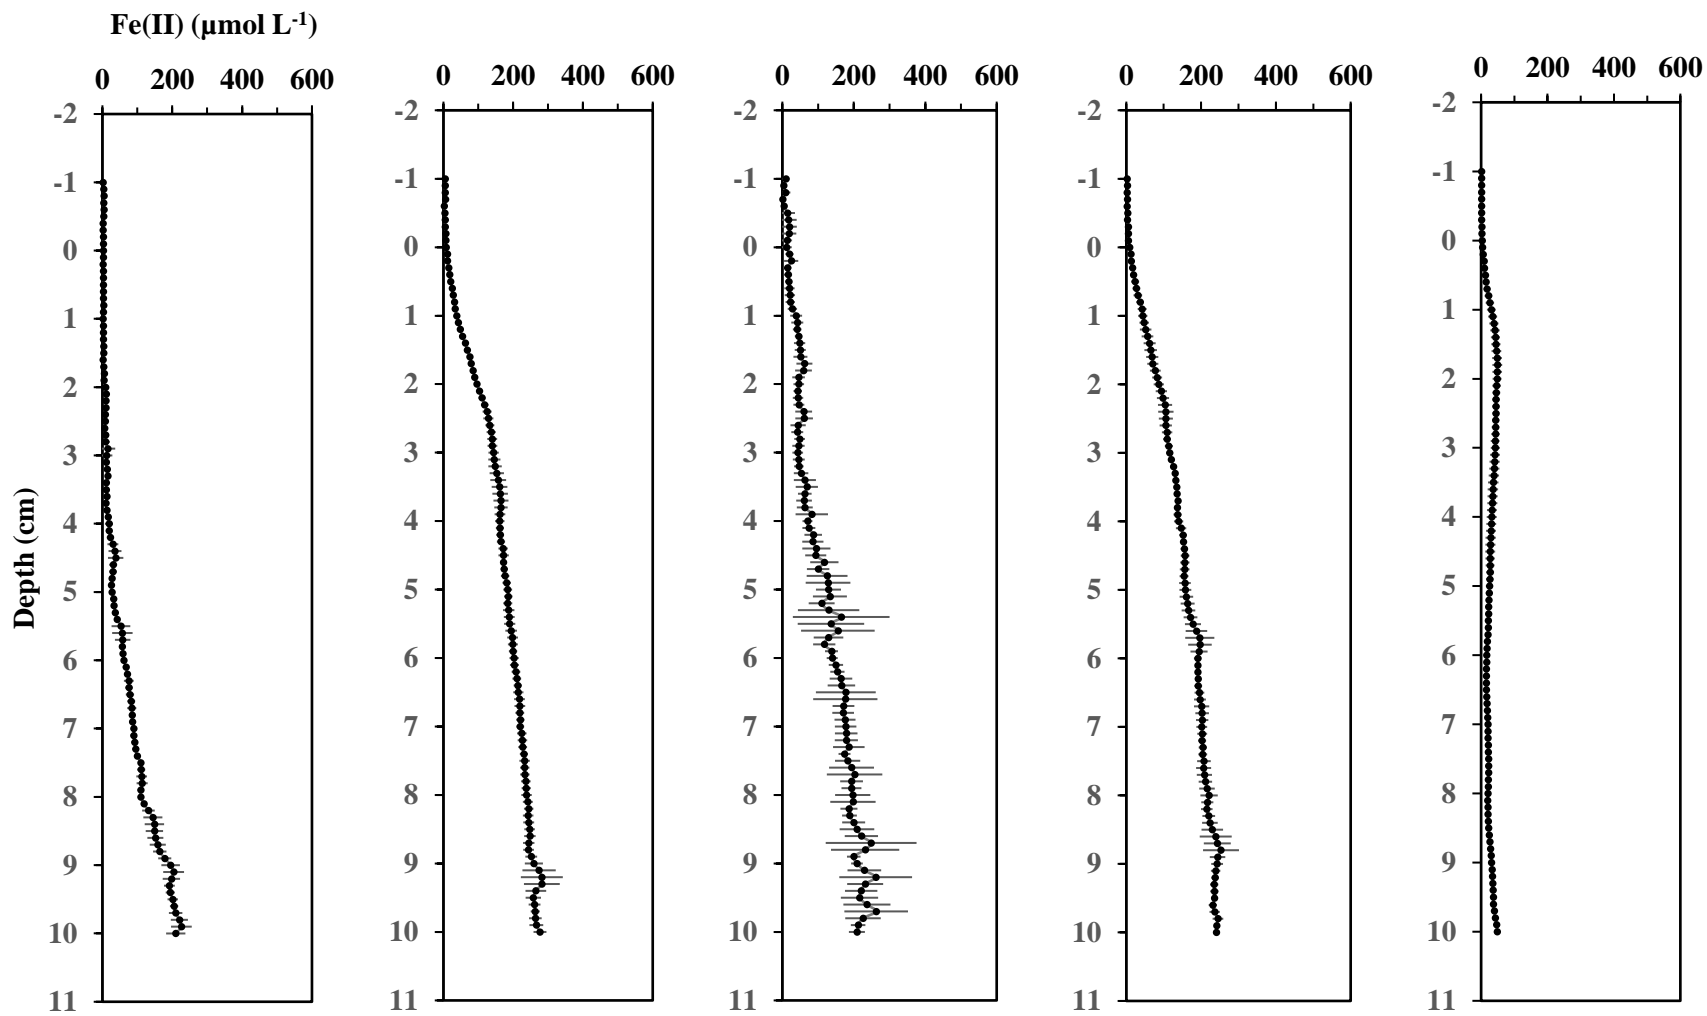

**Figure S5.** Pore water Fe (II) profile determined by colourimetric DET for each sediment core (1 - 5) at site 2 during light incubations.

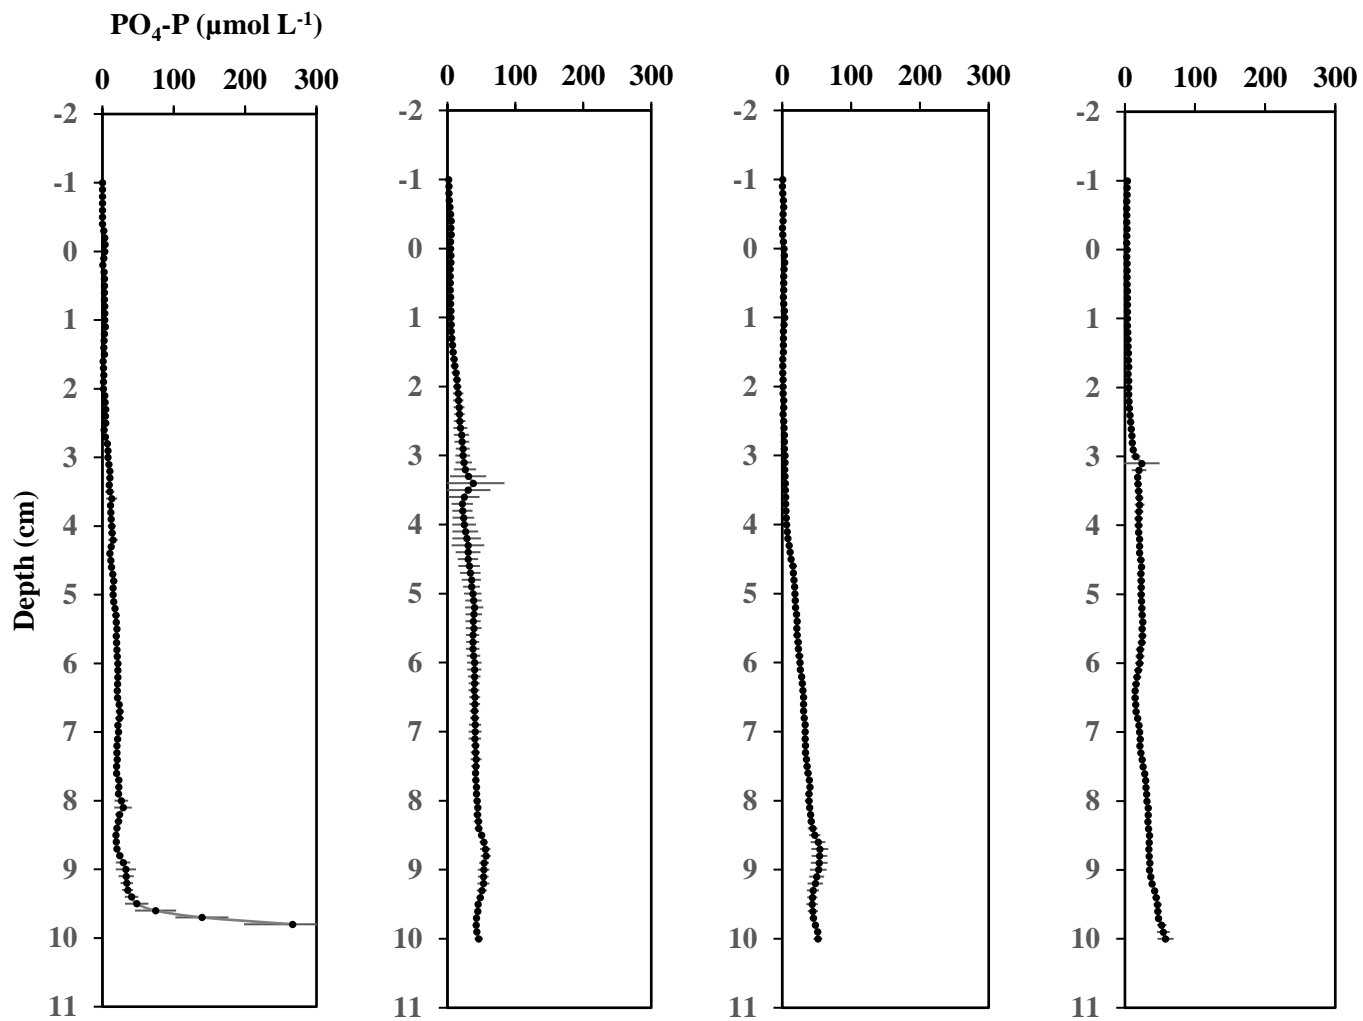

**Figure S6.** Pore water PO<sub>4</sub>-P depth profiles determined by colourimetric DET for each sediment core (1, 2, 3, and 4) at site 2 during light incubations.

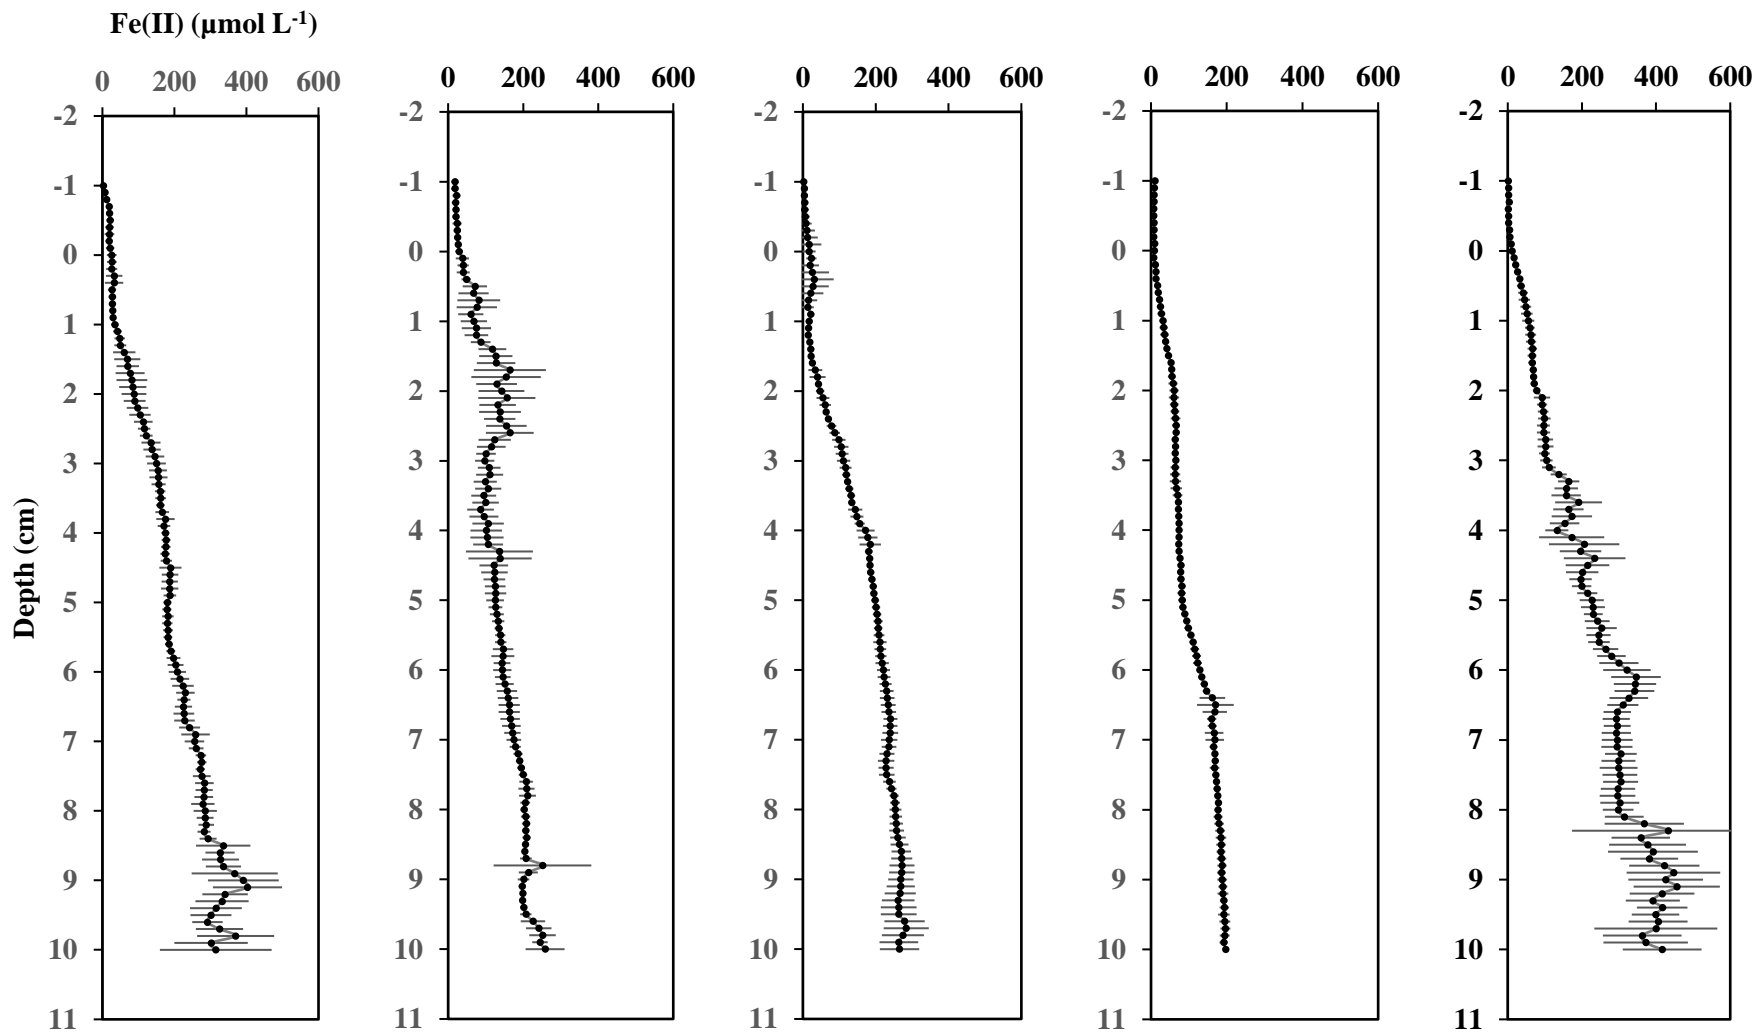

**Figure S7.** Pore water Fe (II) depth profiles determined by colourimetric DET for each sediment core (1 - 5) at site 2 during dark incubations.

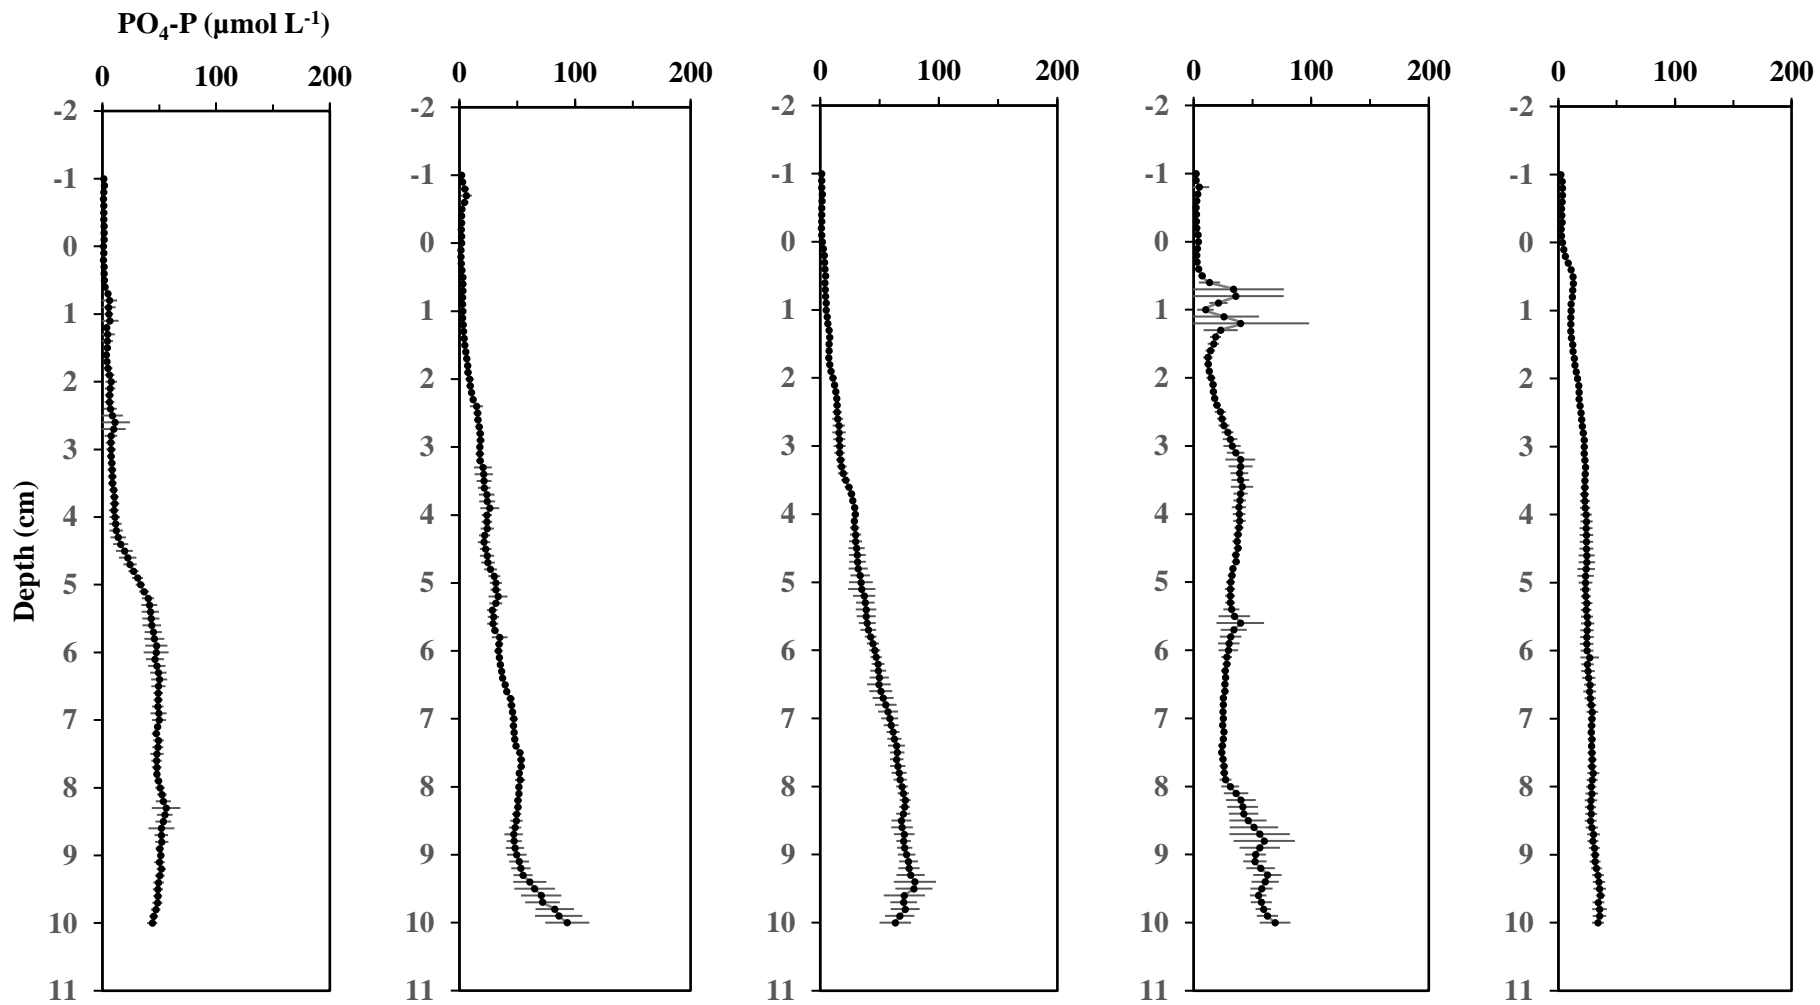

**Figure S8.** Pore water PO<sub>4</sub>-P depth profiles determined by colourimetric DET for each sediment core (1 - 5) at site 2 during dark incubations.



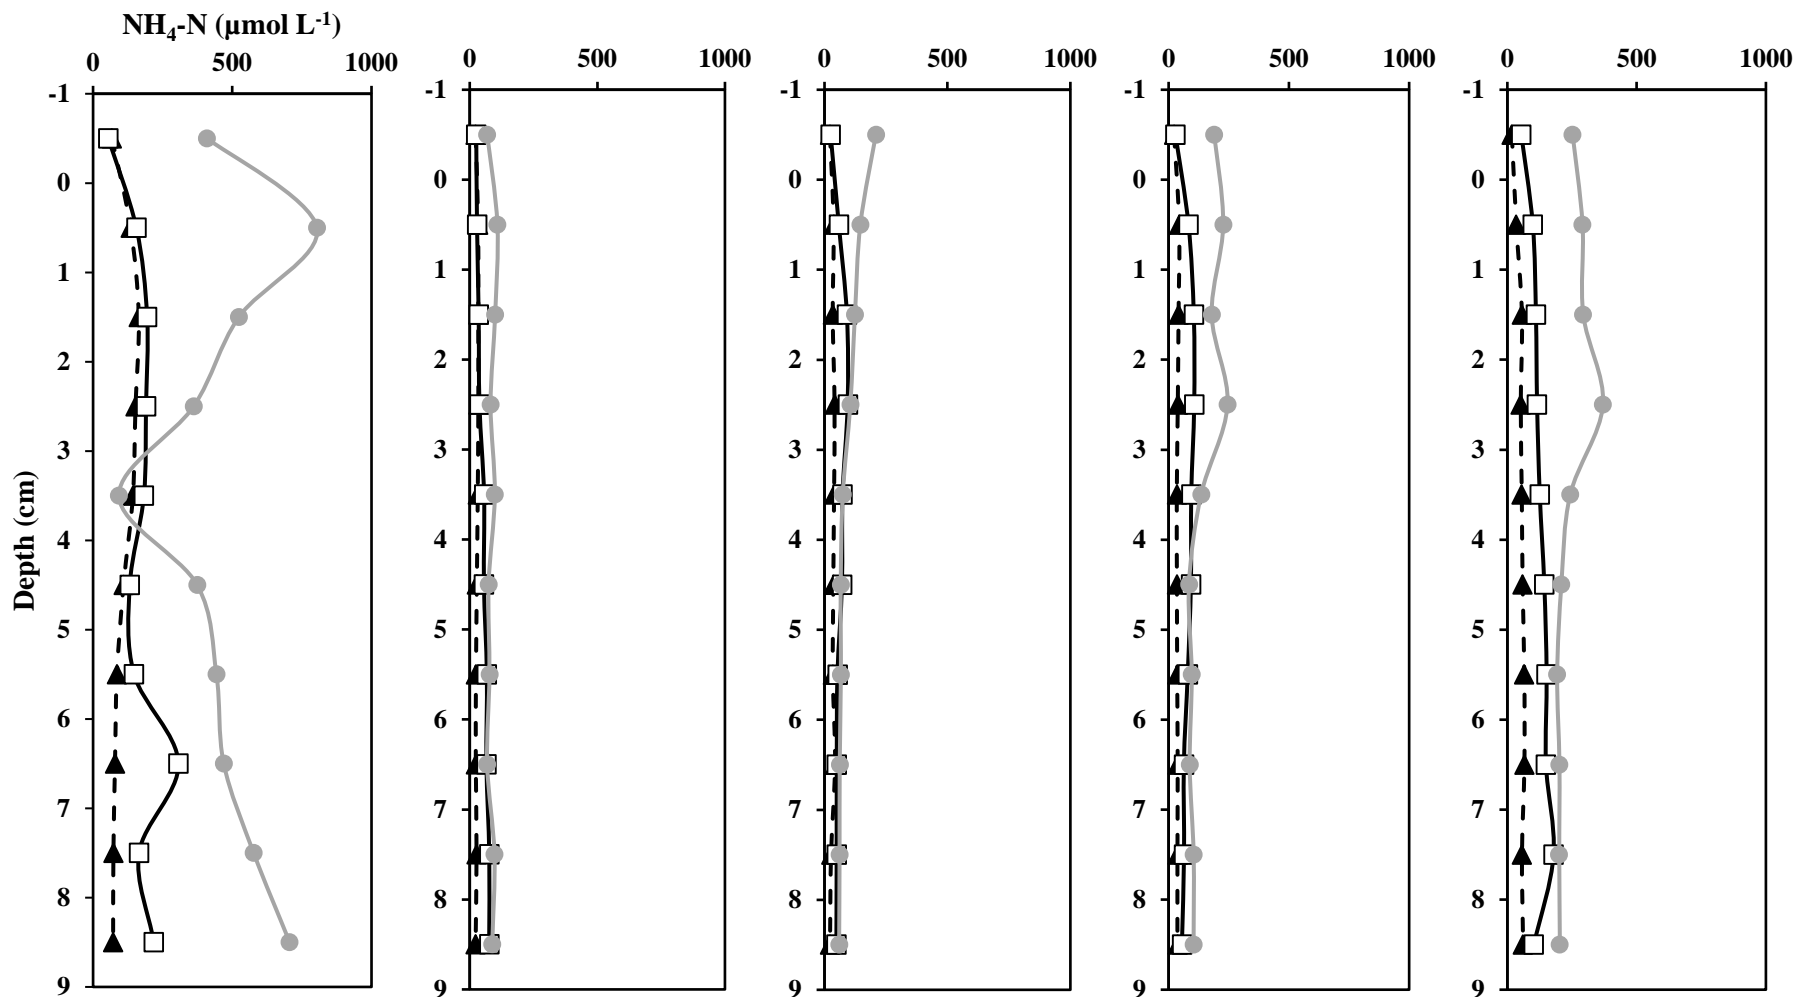

**Figure S9.** Pore water NH<sub>4</sub>-N depth profiles determined by DGT (Black dash line with ▲), DET (Black solid line with □) and conventional extraction (Grey solid line with ●) for each sediment core (1 - 5) at site 1 under light incubation (1).

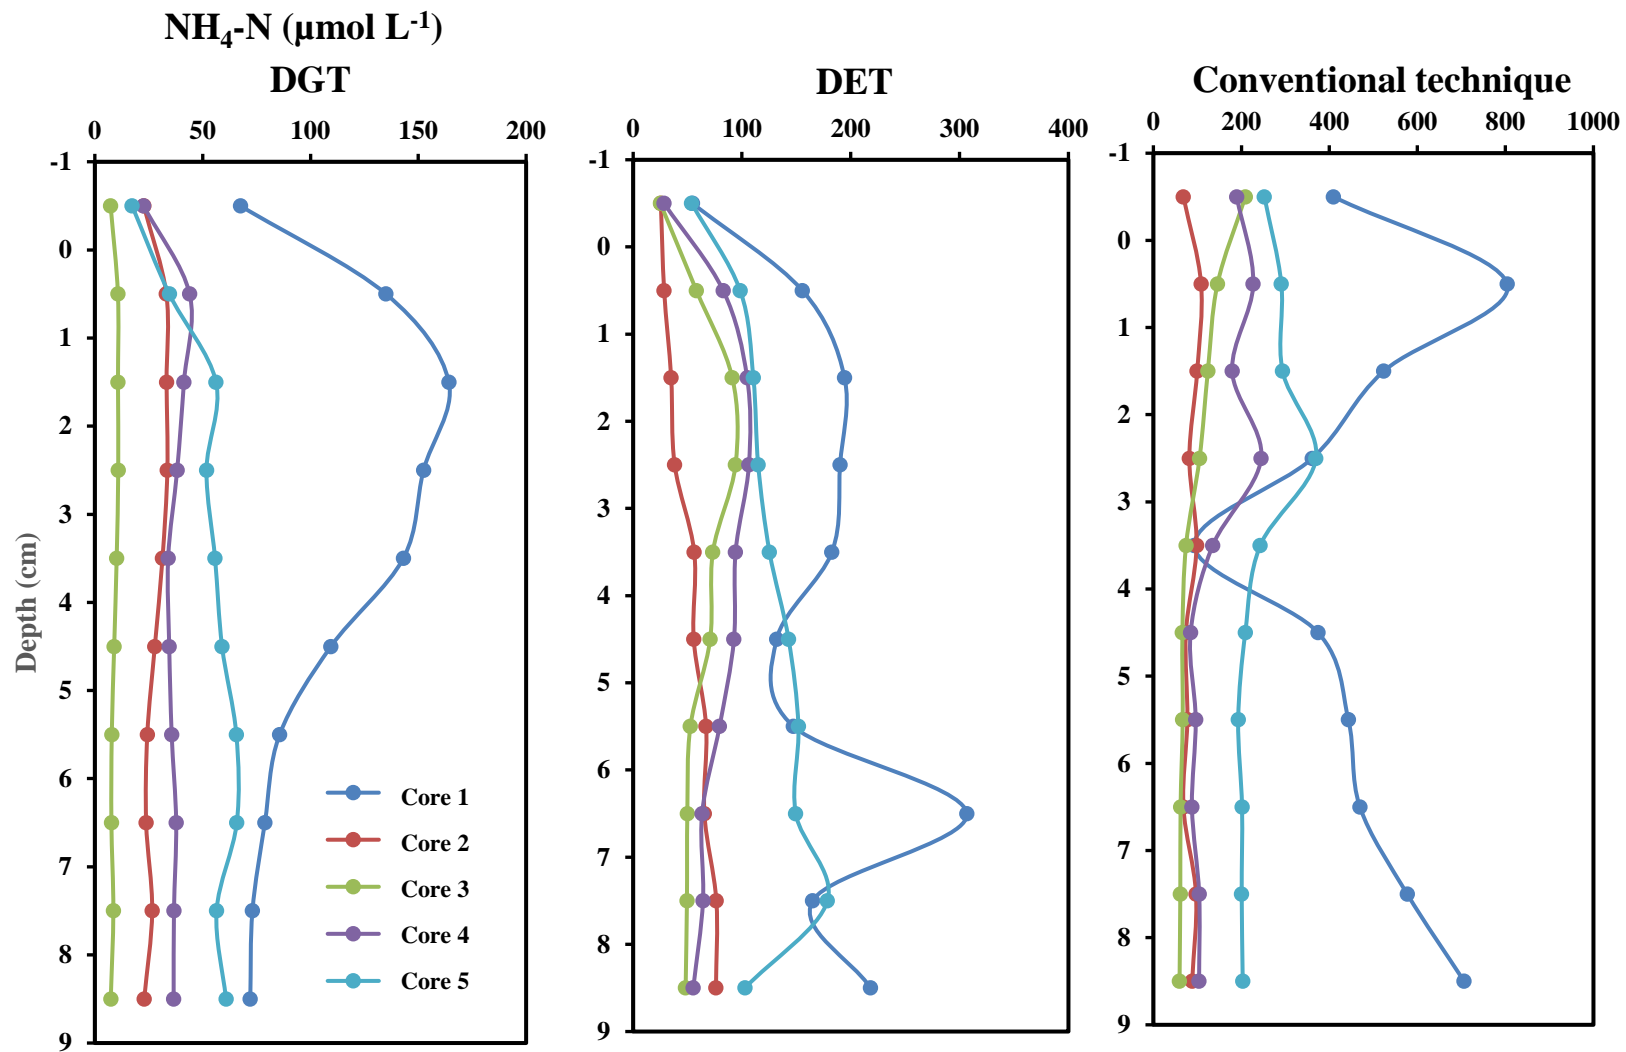

**Figure S10.** Pore water  $\text{NH}_4\text{-N}$  depth profiles determined by DGT, DET and conventional extraction for each sediment core (1 - 5) at site 1 during light incubations (2).

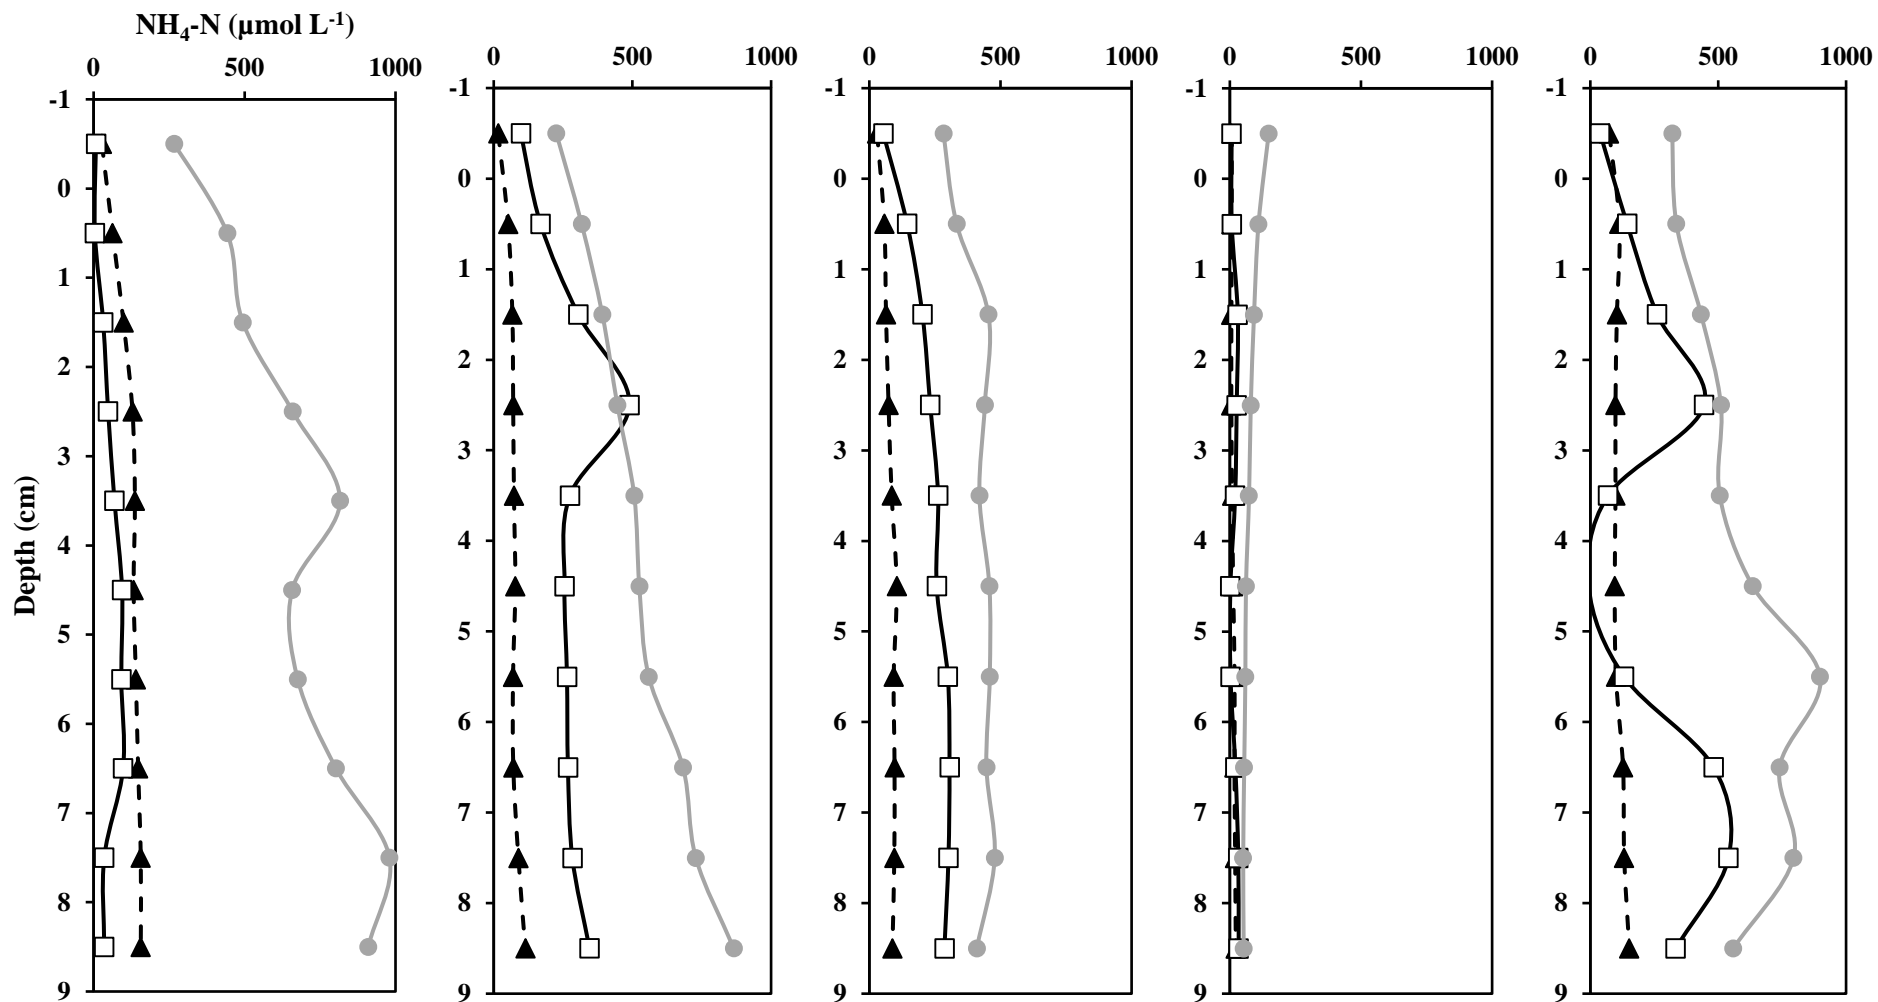

**Figure S11.** Pore water  $\text{NH}_4\text{-N}$  depth profiles determined by DGT (Black dash line with  $\blacktriangle$ ), DET (Black solid line with  $\square$ ) and conventional extraction (Grey solid line with  $\bullet$ ) for each sediment core (1 - 5) at site 1 during dark incubation (1).

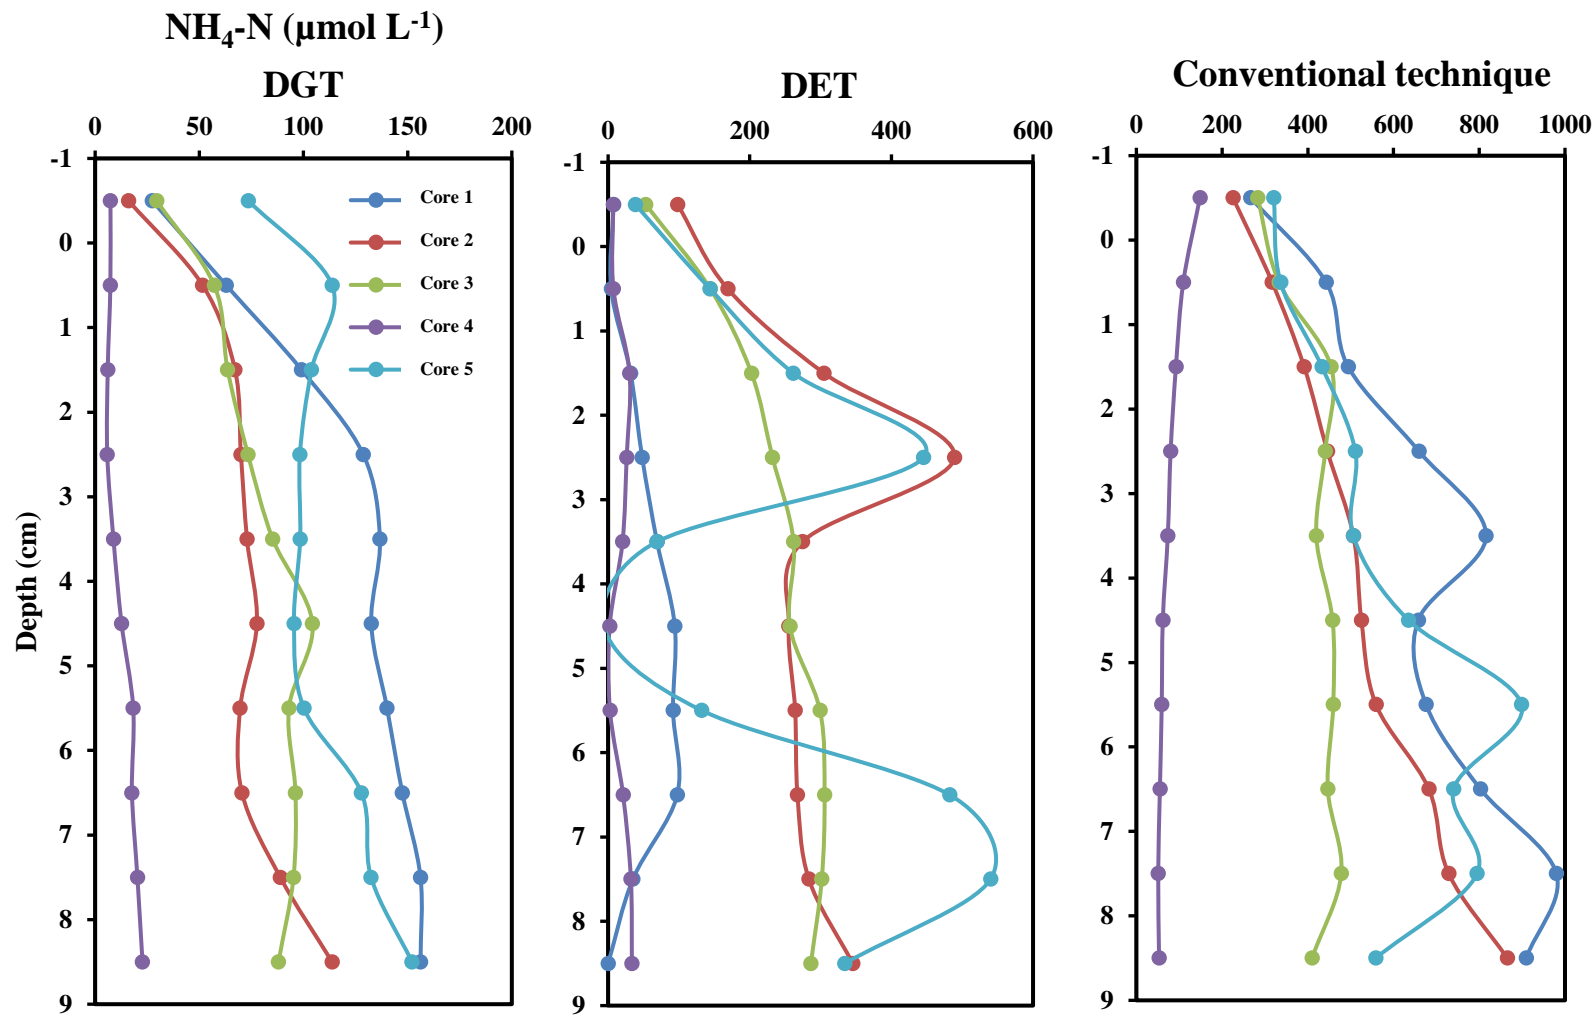

**Figure S12.** Pore water  $\text{NH}_4\text{-N}$  depth profiles determined by DGT, DET and conventional extraction for each sediment core (1 - 5) at site 1 during dark incubations (2).

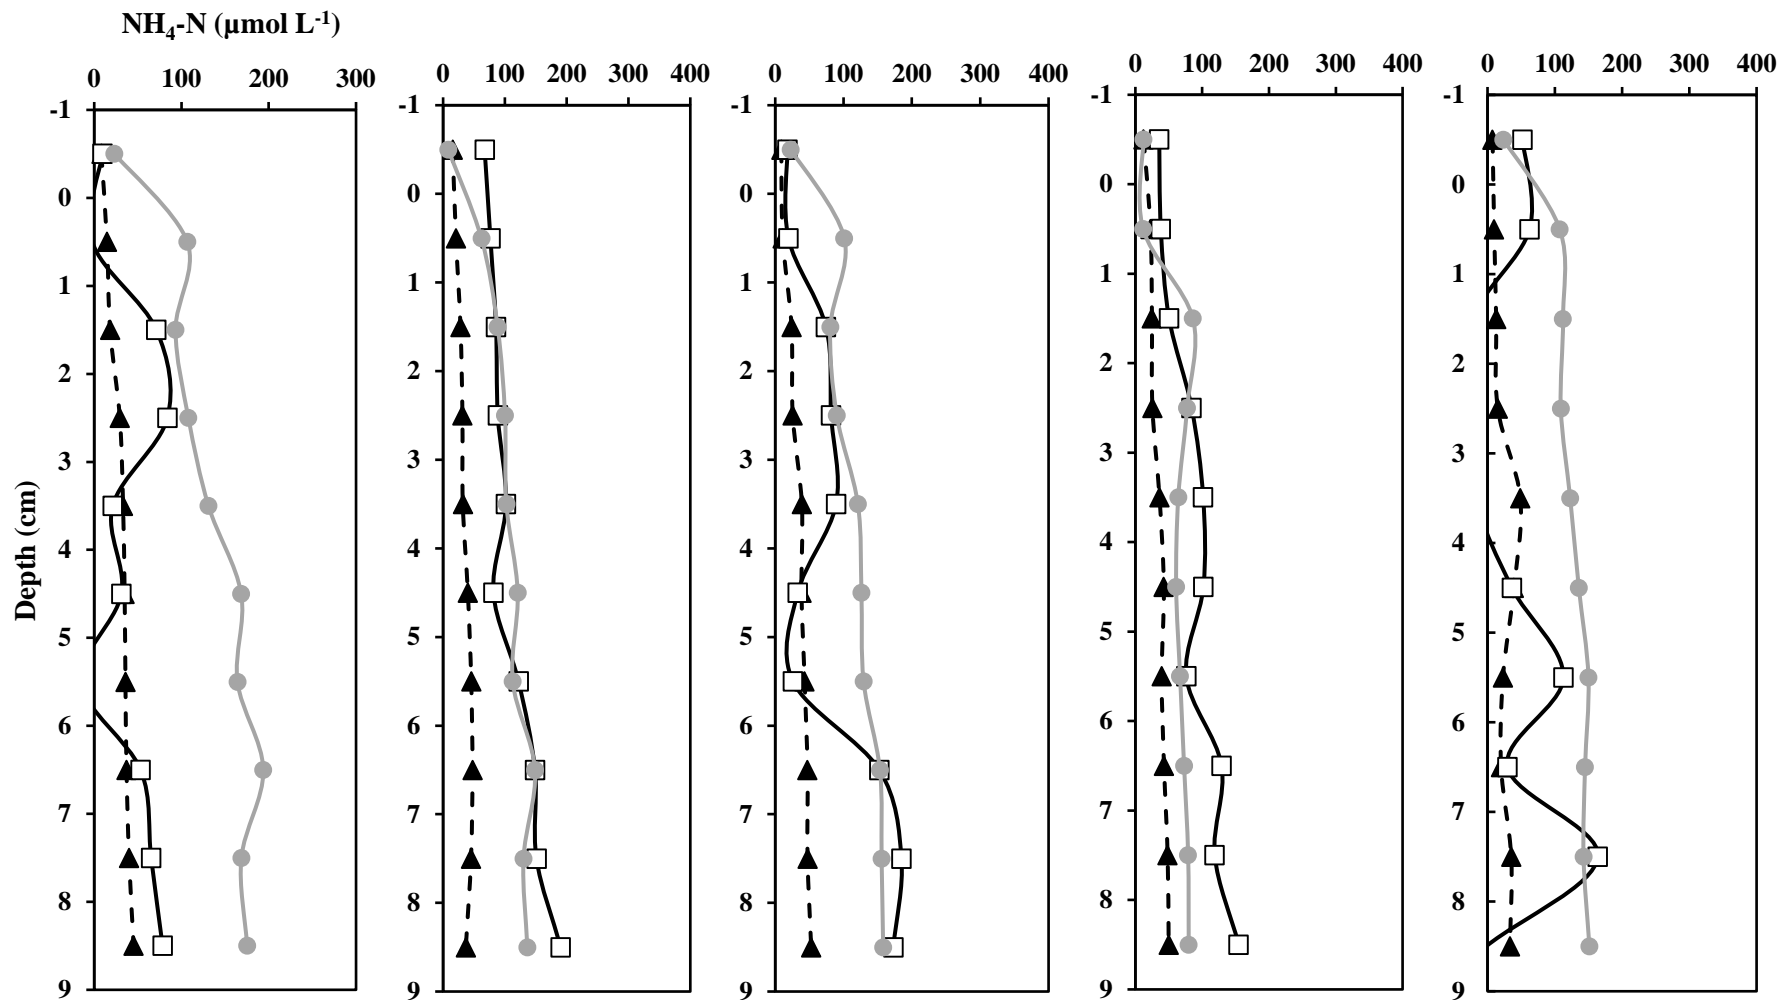

**Figure S13.** Pore water NH<sub>4</sub>-N depth profiles determined by DGT (Black dash line with ▲), DET (Black solid line with □) and conventional extraction (Grey solid line with ●) for each sediment core (1 - 5) at site 2 during dark incubations (1).

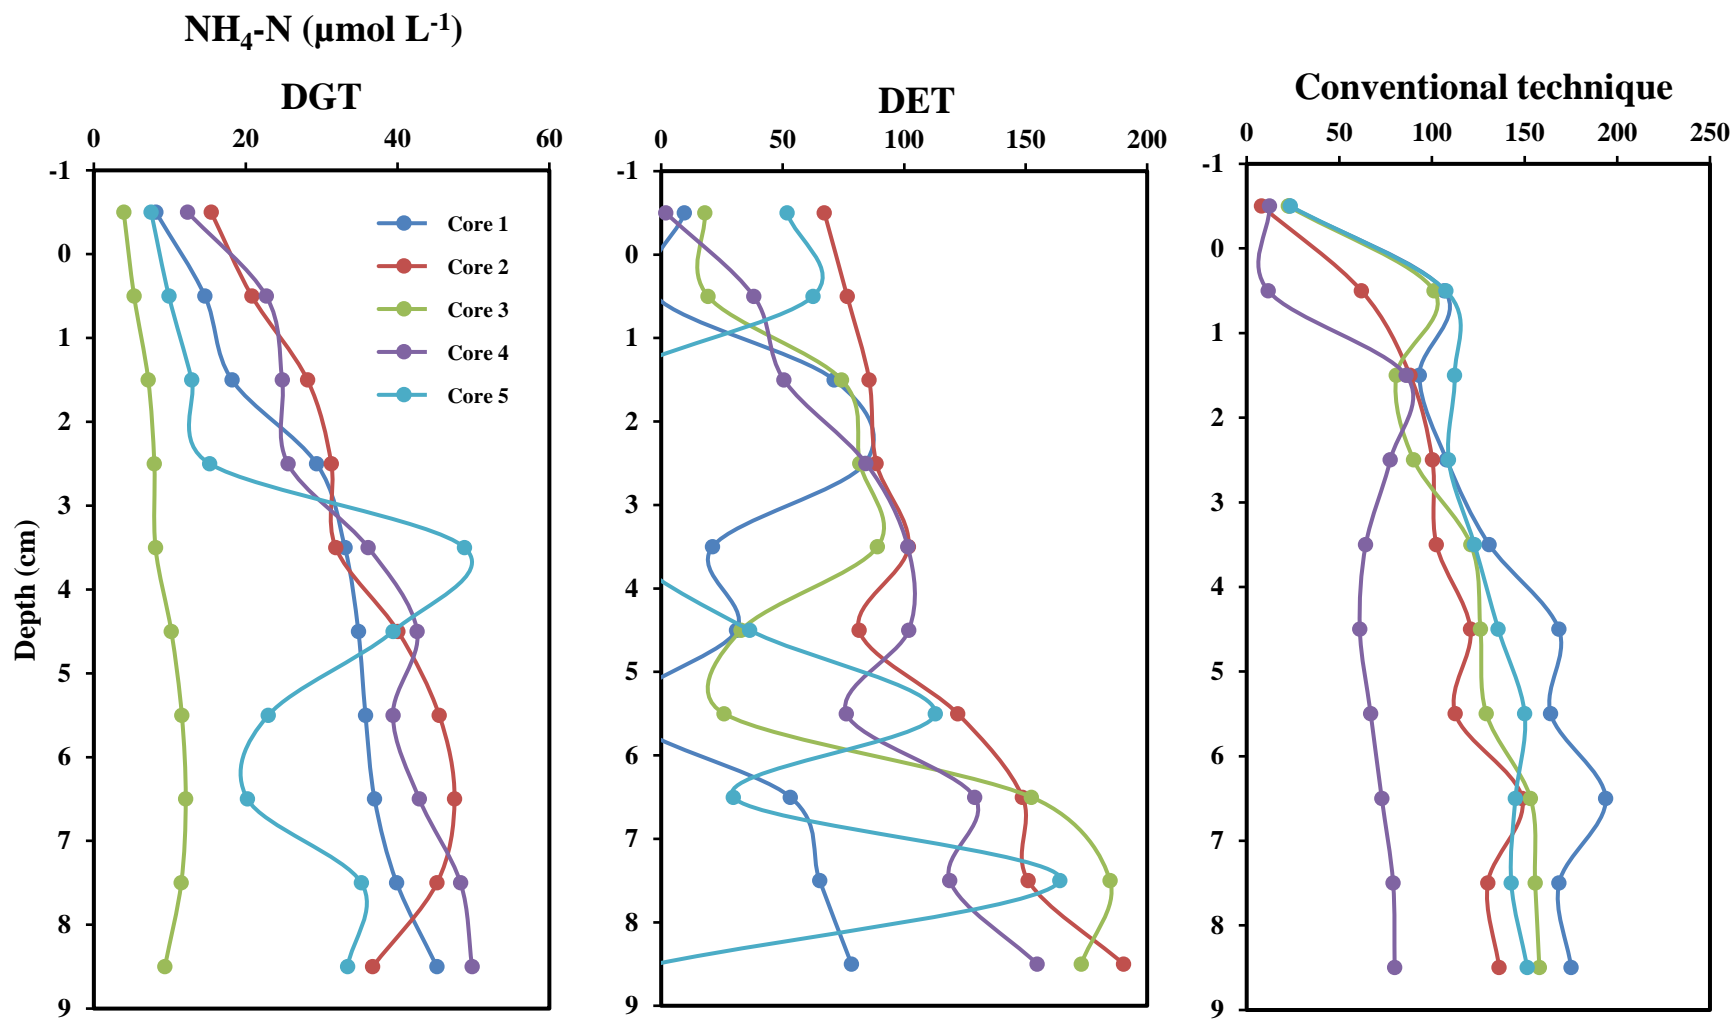

**Figure S14.** Pore water NH<sub>4</sub>-N depth profiles determined by DGT, DET and conventional extraction for each sediment core (1 - 5) at site 2 during light incubations (2).

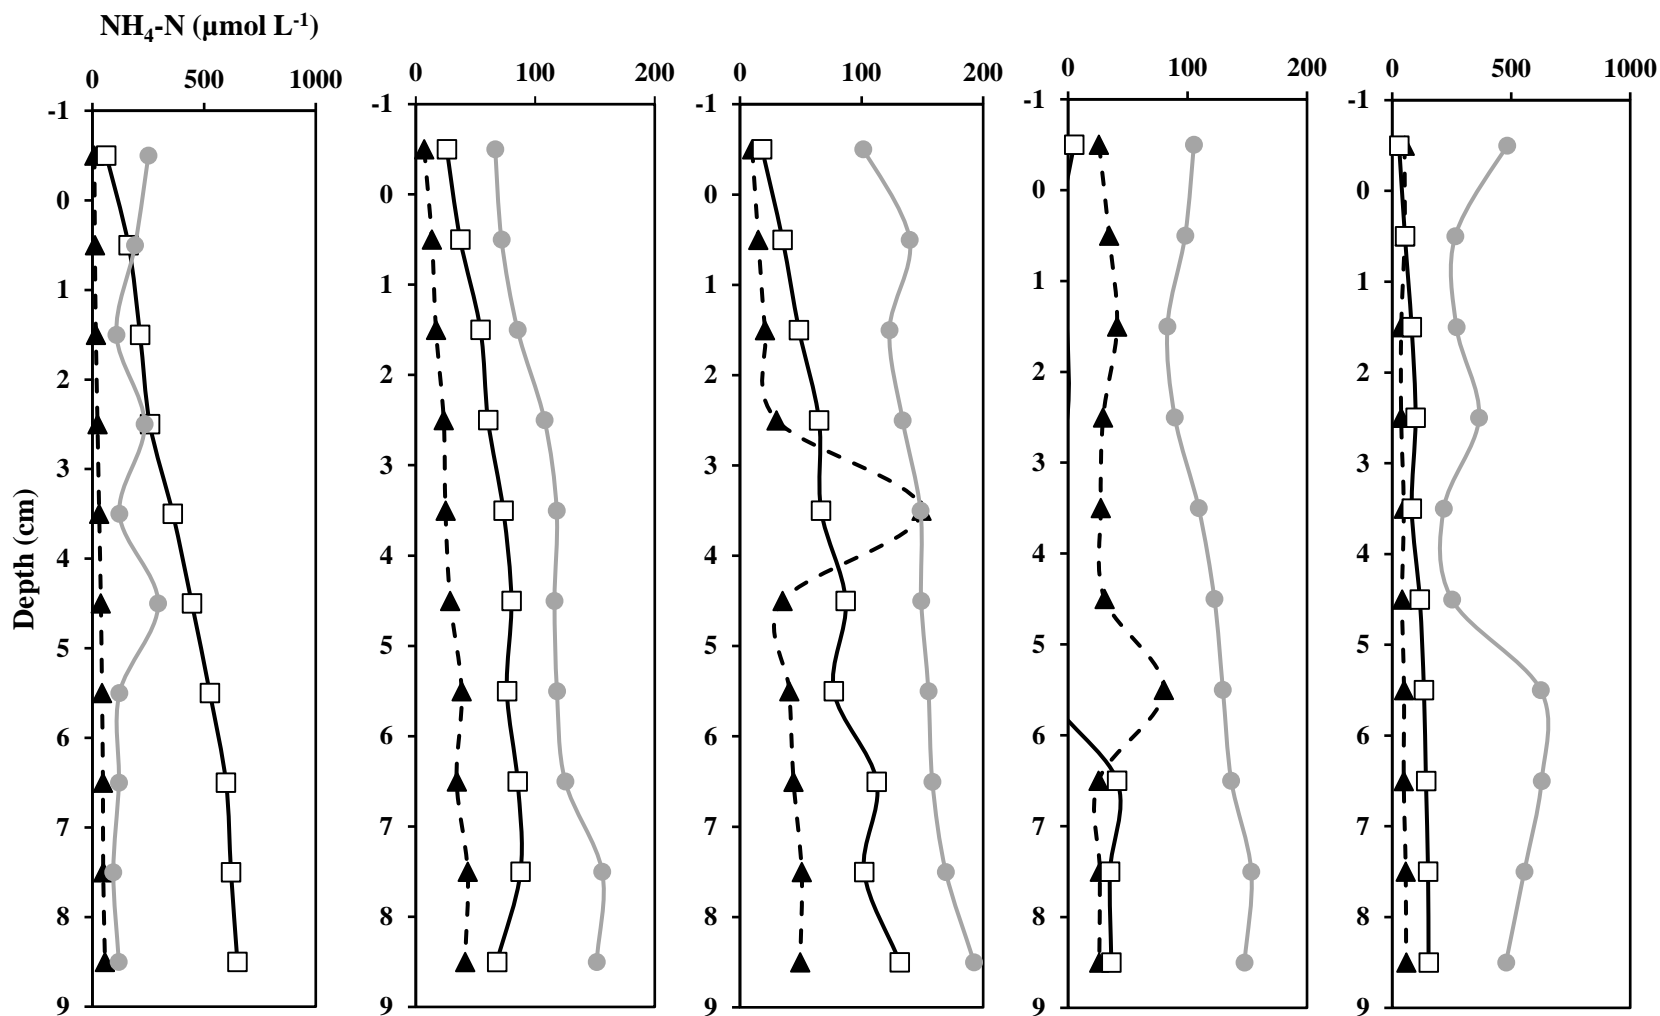

**Figure S15.** Pore water NH<sub>4</sub>-N depth profiles determined by DGT (Black dash line with ▲), DET (Black solid line with □) and conventional extraction (Grey solid line with ●) for each sediment core (1 - 5) at site 2 during light incubations (1).

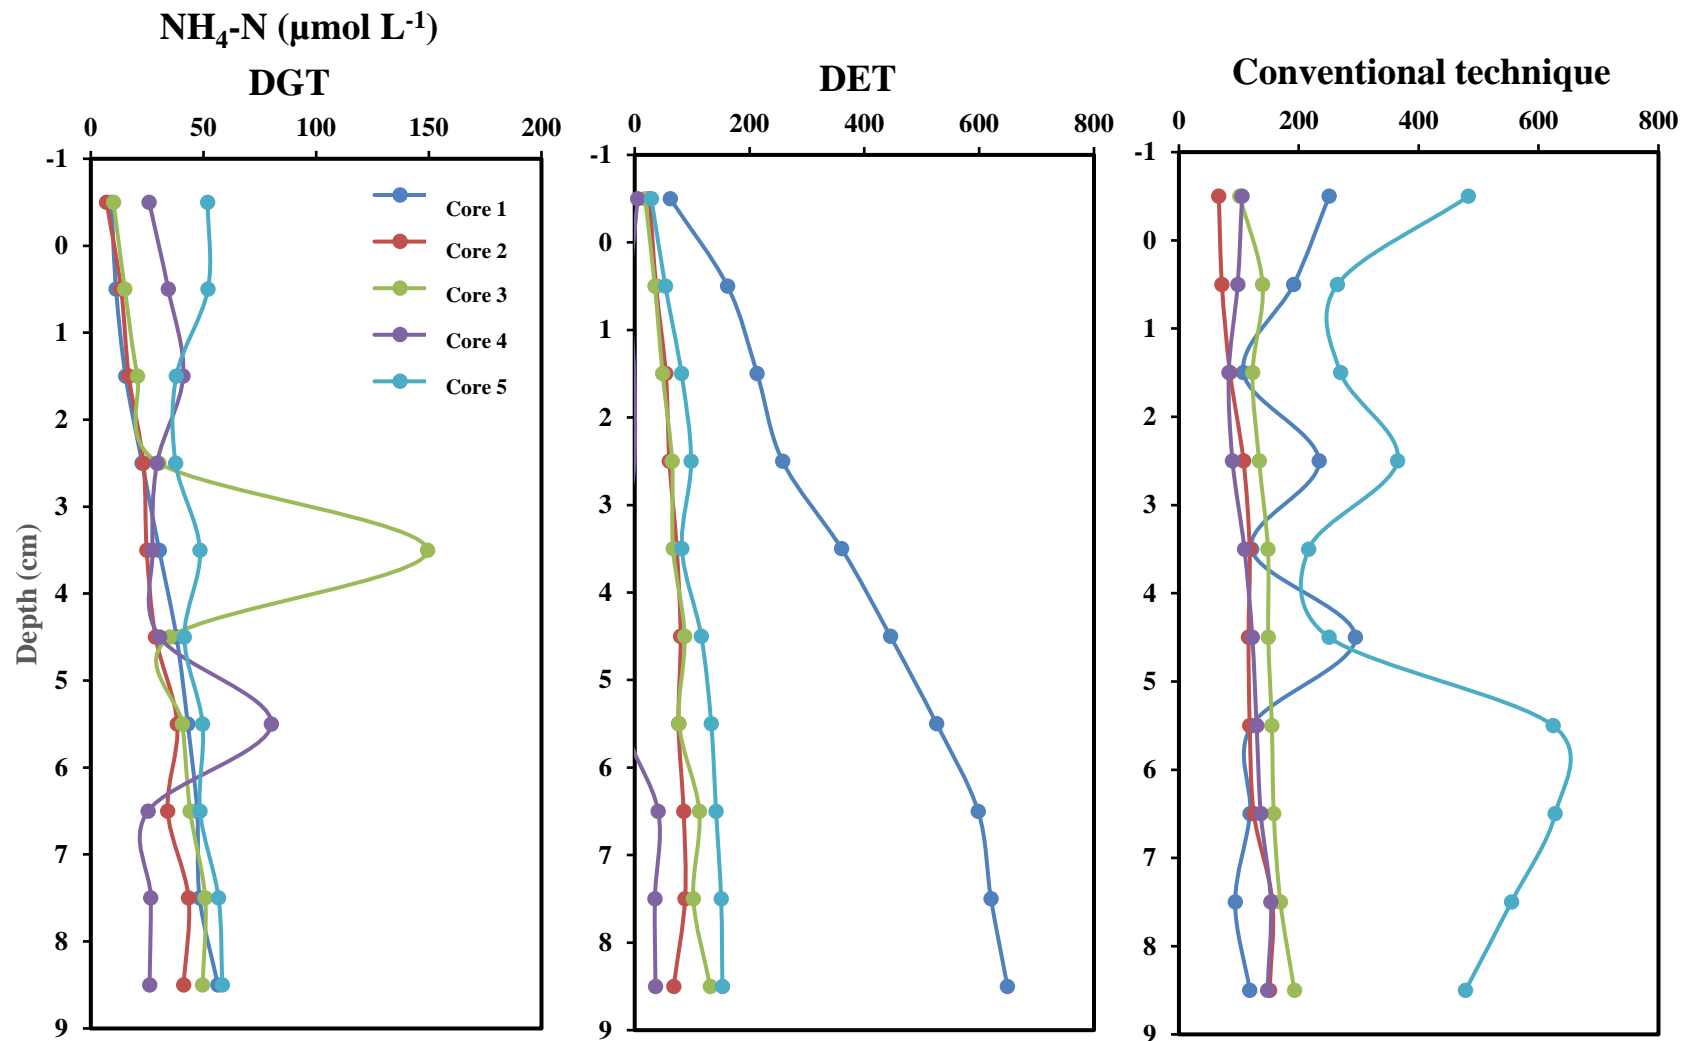

**Figure S16.** Pore water NH<sub>4</sub>-N depth profiles determined by DGT, DET and conventional extraction for each sediment core (1 - 5) at site 2 during dark incubations (2).



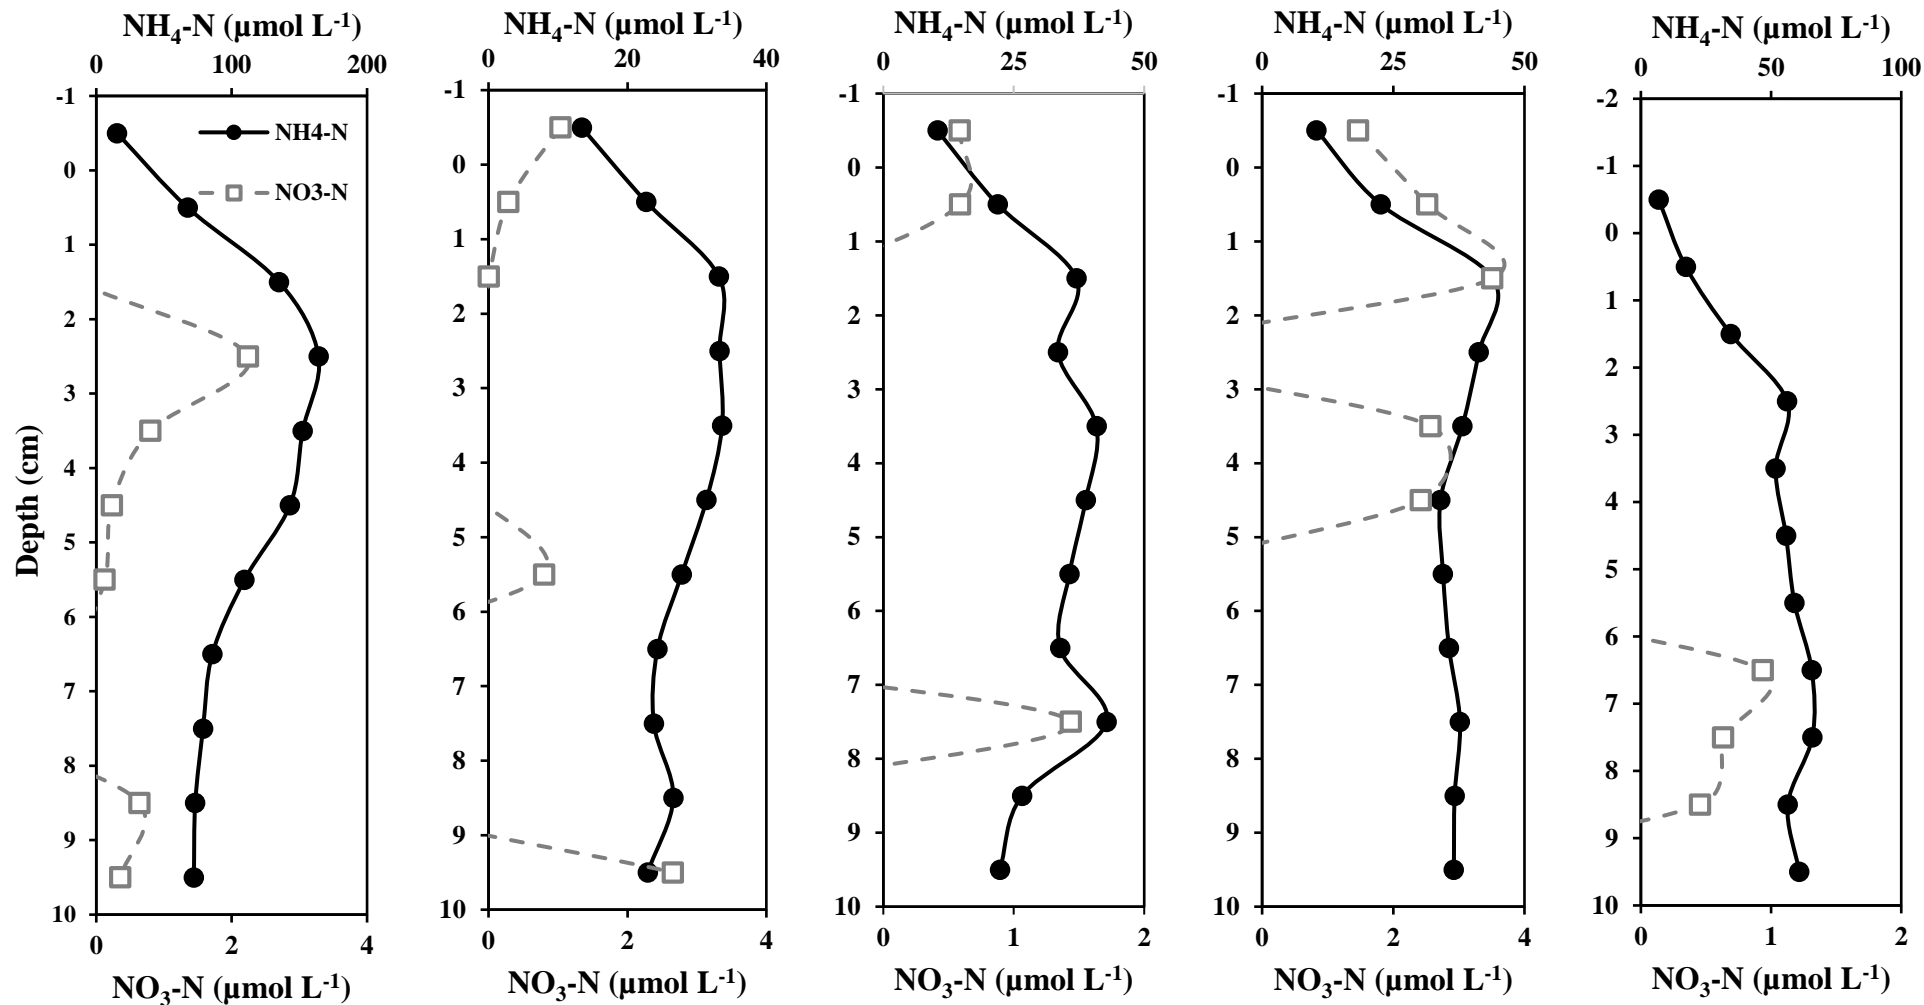

**Figure S17.** Pore water  $\text{NH}_4\text{-N}$  (Black solid line with ●) and  $\text{NO}_3\text{-N}$  (Grey dash line with □) depth profiles determined by DGT for each sediment core (1 - 5) at site 1 during light incubations.

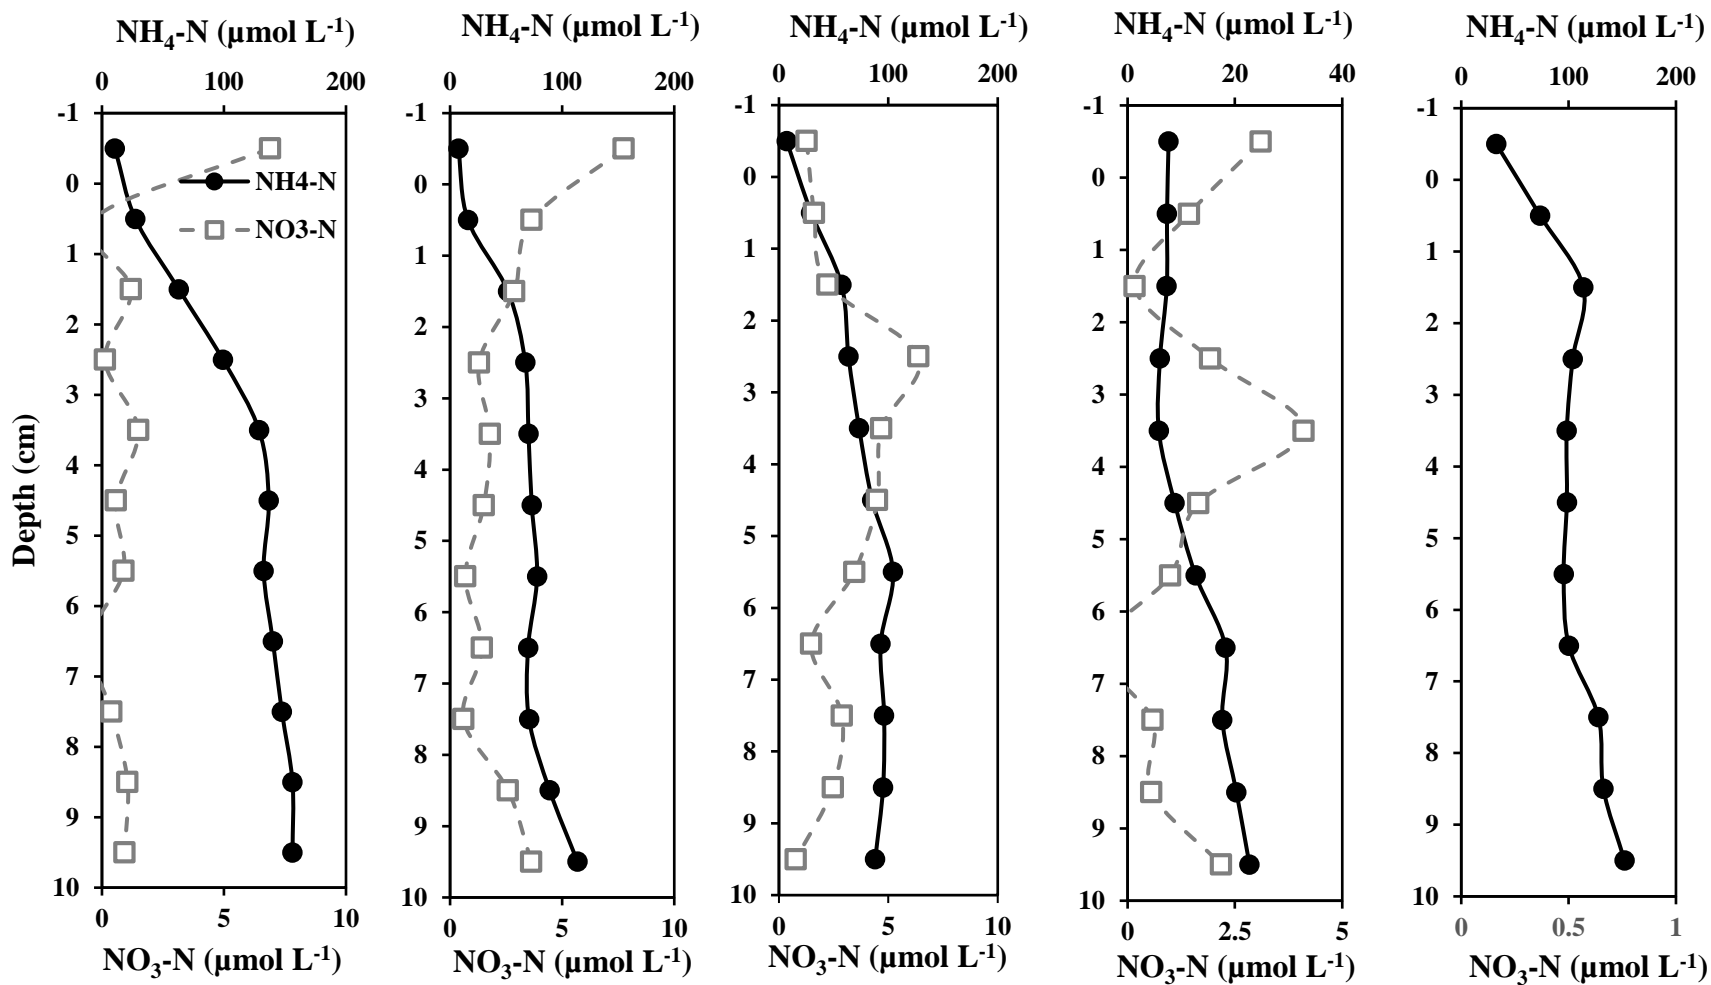

**Figure S18.** Pore water NH<sub>4</sub>-N (Black solid line with ●) and NO<sub>3</sub>-N (Grey dash line with □) depth profiles determined by DGT for each sediment core (1 - 5) at site 1 during dark incubations.

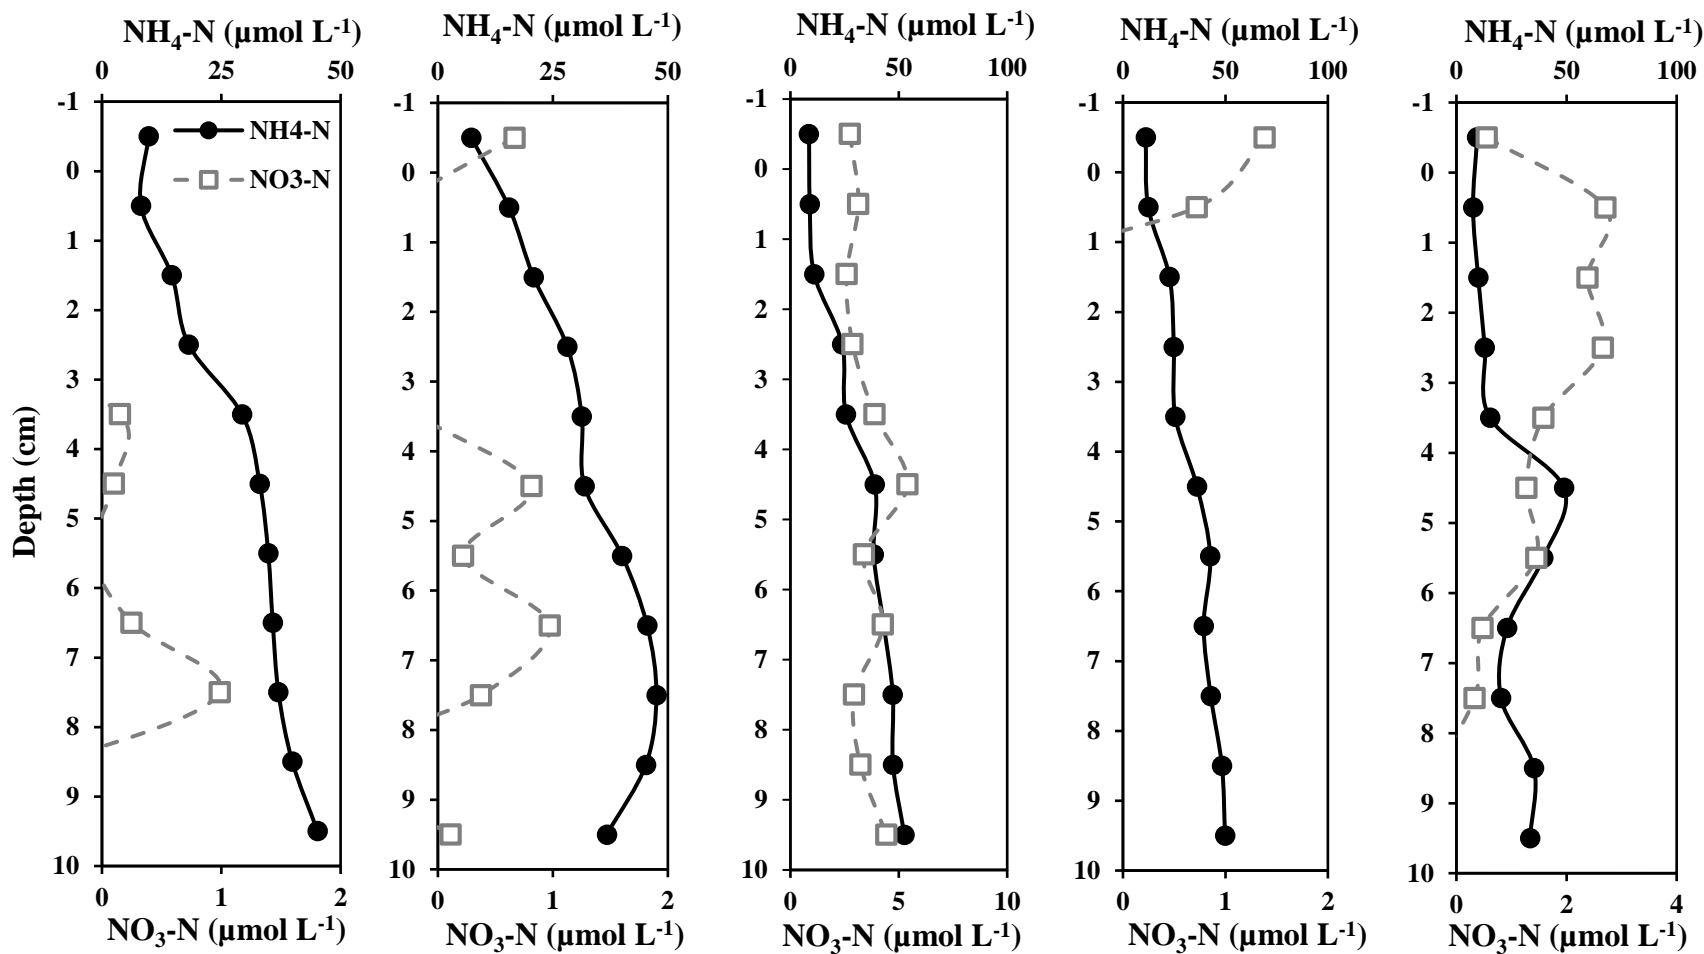

**Figure S19.** Pore water  $\text{NH}_4\text{-N}$  (Black solid line with ●) and  $\text{NO}_3\text{-N}$  (Grey dash line with □) depth profiles determined by DGT for each sediment core (1 - 5) at site 2 during light incubations.

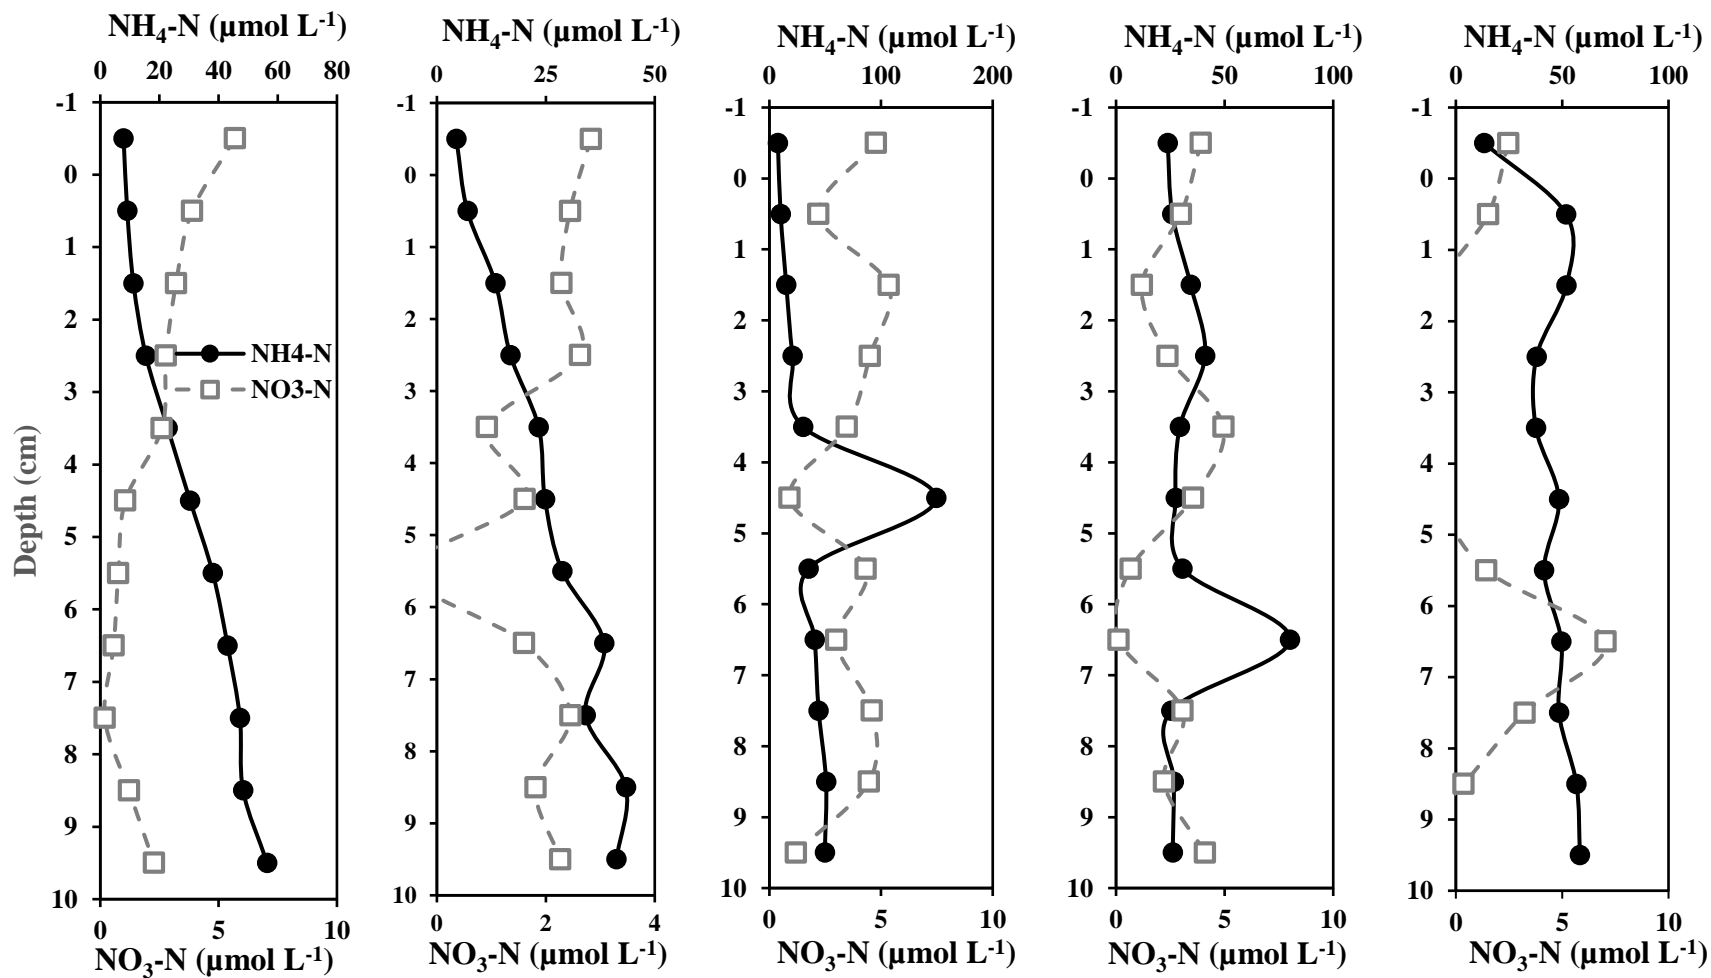

**Figure S20.** Pore water NH<sub>4</sub>-N (Black solid line with ●) and NO<sub>3</sub>-N (Grey dash line with □) profile profiles determined by DGT for each sediment core (1 - 5) at site 2 during dark incubations.

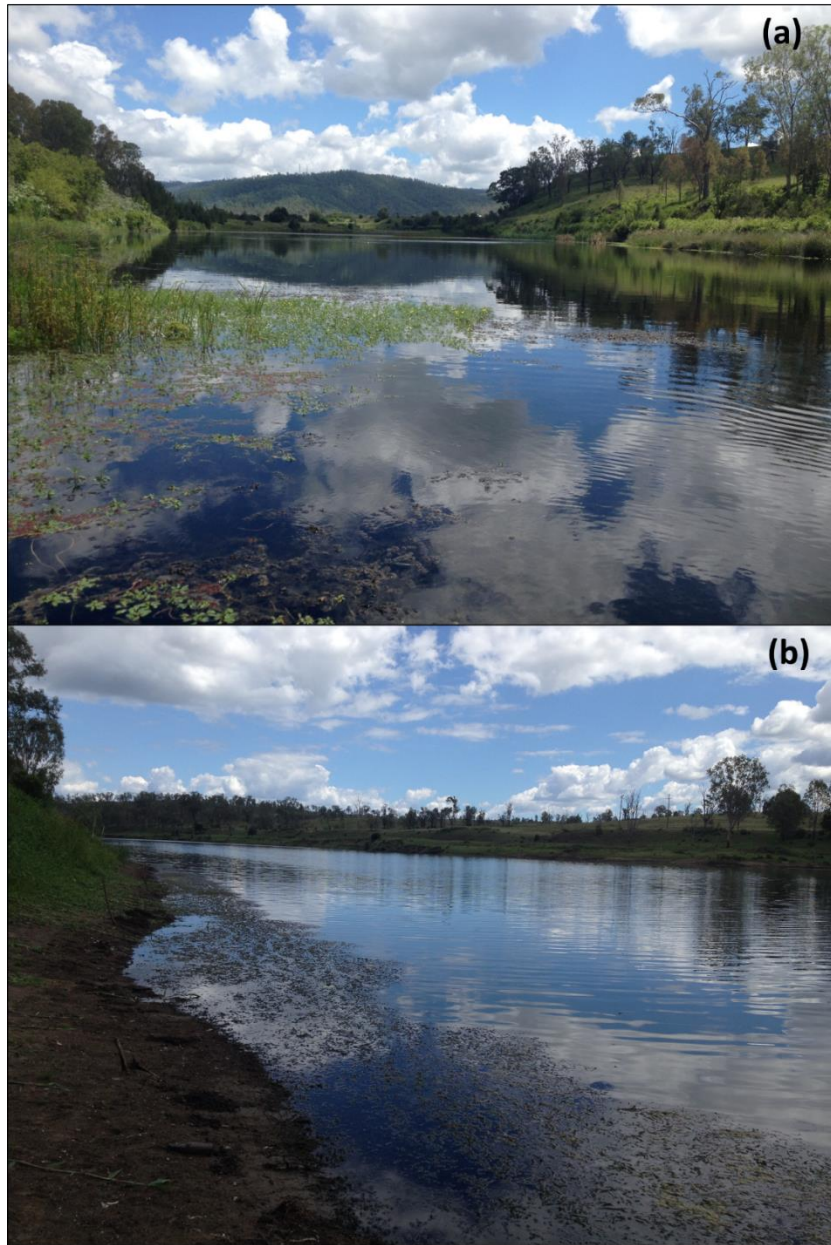

**Figure S21.** Photos of (a) Site 1 and (b) Site 2 taken at the time of sampling. The area in which cores were collected is in the foreground of each photo.

## References

1. Zhang, H.; Davison, W., In situ speciation measurements of trace components in natural-waters using thin-film gels. *Nature* **1994**, *367*, (6463), 546–548.
2. Zhang, H.; Davison, W., Performance Characteristics of Diffusion Gradients in Thin Films for the In Situ Measurement of Trace Metals in Aqueous Solution. *Anal. Chem.* **1995**, *69*, (19), 3391-3400.
